1 “Heat waves” experienced during larval life have species-specific consequences on life-history  
2 traits and sexual development in anuran amphibians

3

4 János Ujszegi<sup>1,2\*</sup>, Réka Bertalan<sup>1</sup>, Nikolett Ujhegyi<sup>1</sup>, Viktória Verebélyi<sup>1</sup>, Edina Nemesházi<sup>1,3,4</sup>  
5 Zsanett Mikó<sup>1</sup>, Andrea Kásler<sup>1,5</sup>, Dávid Herczeg<sup>1</sup>, Márk Szederkényi<sup>1</sup>, Nóra Vili<sup>3</sup>, Zoltán Gál<sup>6</sup>,  
6 Orsolya I. Hoffmann<sup>6</sup>, Veronika Bókony<sup>1,3§</sup>, Attila Hettyey<sup>1,2,3§</sup>

7

8 <sup>1</sup>Lendület Evolutionary Ecology Research Group, Plant Protection Institute, Centre for  
9 Agricultural Research, Eötvös Loránd Research Network, Budapest, Hungary

10 <sup>2</sup>Department of Systematic Zoology and Ecology, Eötvös Loránd University, Budapest, Hungary

11 <sup>3</sup>Department of Ecology, Institute for Biology, University of Veterinary Medicine, Budapest,  
12 Hungary

13 <sup>4</sup>Konrad Lorenz Institute of Ethology, Department of Interdisciplinary Life Sciences, University  
14 of Veterinary Medicine, Vienna, Austria

15 <sup>5</sup>Doctoral School of Biology, Institute of Biology, Eötvös Loránd University, Budapest,  
16 Hungary

17 <sup>6</sup>Animal Biotechnology Department, Institute of Genetics and Biotechnology, Hungarian  
18 University of Agriculture and Life Science, Gödöllő, Hungary

19

20 \*Corresponding author

21 e-mail: [ujszegi.janos@gmail.com](mailto:ujszegi.janos@gmail.com)

22 tel.: +36-1-3918607

23 fax: +36-1-3918653

24 ORCID ID: 0000-0002-6030-0772

25

26 <sup>§</sup>Veronika Bókony and Attila Hettyey should be considered joint senior author

27

28 Running Title: Effect of heat waves on larval anurans

29

30 Abstract

31 Extreme temperatures during heat waves can induce mass-mortality events, but can also exert  
32 sublethal negative effects by compromising life-history traits and derailing sexual development.  
33 Ectothermic animals may, however, also benefit from increased temperatures via enhanced  
34 physiological performance and the suppression of cold-adapted pathogens. Therefore, it is  
35 crucial to address how the intensity and timing of naturally occurring or human-induced heat  
36 waves affect life-history traits and sexual development in amphibians, to predict future effects of  
37 climate change and to minimise risks arising from the application of elevated temperature in  
38 disease mitigation. We raised agile frog (*Rana dalmatina*) and common toad (*Bufo bufo*)  
39 tadpoles at 19 °C and exposed them to a simulated heat wave of 28 or 30 °C for six days during  
40 one of three ontogenetic periods (early, mid or late larval development). In agile frogs, exposure  
41 to 30 °C during early larval development increased mortality. Regardless of timing, all heat-  
42 treatments delayed metamorphosis, and exposure to 30 °C decreased body mass at  
43 metamorphosis. Furthermore, exposure to 30 °C during any period and to 28 °C late in  
44 development caused female-to-male sex reversal, skewing sex ratios strongly towards males. In  
45 common toads, high temperature only slightly decreased survival and did not influence  
46 phenotypic sex ratio, while it reduced metamorph mass and length of larval development.  
47 Juvenile body mass measured two months after metamorphosis was not adversely affected by  
48 temperature treatments in either species. Our results indicate that heat waves may have  
49 devastating effects on amphibian populations, and the severity of these negative consequences,  
50 and sensitivity can vary greatly between species and with the timing and intensity of heat.  
51 Finally, thermal treatments against cold-adapted pathogens have to be executed with caution,

52 taking into account the thermo-sensitivity of the species and the life stage of animals to be

53 treated.

54

55 Keywords:

56 *Batrachochytrium dendrobatidis*; Bufonidae; Chytridiomycosis; Heat stress; Ranidae; Thermal

57 tolerance

58

## 59 Introduction

60 Earth's wildlife and ecosystem face the sixth mass extinction event today due to anthropogenic  
61 environmental alterations, including extreme climatic conditions (Ceballos et al. 2015). Due to  
62 global climate change, heat waves occur with increasing frequency, intensity and duration  
63 (Gardner et al. 2016). Extreme temperatures during heat waves expose species to intensified  
64 physiological stress (Williams et al. 2016) and can even induce mass-mortality events  
65 (Welbergen et al. 2008, McKechnie and Wolf 2019). Warming climate with frequently  
66 reappearing heat waves can alter species distributions (Krockenberger et al. 2012, Stillman  
67 2019), trigger shifts in the timing of the breeding season and directly affect breeding success in a  
68 taxonomically diverse range of species (Blaustein et al. 2001, Oswald et al. 2008, Truebano et al.  
69 2018, Stillman 2019). These factors can generate profound changes in community structure and  
70 ecosystem functioning via the formation of interactions between species with previously non-  
71 overlapping spatial or temporal distributions (Williams et al. 2016) and the alteration of predator-  
72 prey and host-pathogen systems (Blaustein et al. 2010, Cohen et al. 2019, Stillman 2019,  
73 Carreira et al. 2020). Fluctuations in temperature affect ectotherms in particular because they  
74 lack the metabolic, physiological and anatomical mechanisms that would allow them to maintain  
75 constant body temperature, and, therefore, ectotherms are able to maintain high physiological  
76 performance only within a narrower environmental temperature range than are endotherms  
77 (Clarke and Pörtner 2010).

78 Amphibians are among the most threatened vertebrate groups, because 41 % of the species  
79 are endangered (IUCN 2021), and almost 50 % show population declines worldwide, mainly due  
80 to anthropogenic environmental change (Stuart et al. 2004, Wake and Vredenburg 2008, Hof et

81 al. 2011, Monastersky 2014, Campbell Grant et al. 2016). The growing incidence of  
82 meteorological extremes and rising temperatures resulting from global climate change and  
83 anthropogenic heat pollution (i.e. urban heat islands; Arnfield 2003, Brans et al. 2018) are major  
84 threats to amphibians. Their complex life cycle, usually including an aquatic stage, the unshelled  
85 eggs and a highly permeable integument make amphibians excessively sensitive to water  
86 availability. Also, though amphibian larvae generally exhibit a relatively high thermal tolerance  
87 (Ultsch et al. 1999, Sunday et al. 2011, but also see Harkey and Semlitsch 1988, Wallace and  
88 Wallace 2000, Bellakhal et al. 2014, Goldstein et al. 2017) temperatures as low as 30 °C  
89 experienced during the larval period can be detrimental to them. Heat can result in delayed  
90 metamorphosis (Goldstein et al. 2017), reduced body mass (Harkey and Semlitsch 1988, Phuge  
91 2017, Lambert et al. 2018), disabled locomotor activity (Goldstein et al. 2017), sex reversal  
92 (Dournon et al. 1984, Wallace and Wallace 2000, Mikó et al. 2021) and biased sex ratios (Phuge  
93 2017, Lambert et al. 2018, Ruiz-García et al. 2021). Exposure of adult frogs to 30 °C or higher  
94 can increase stress hormone levels (Juráni et al. 1973, Narayan and Hero 2014) and enhance the  
95 processes that contribute to accelerated ageing (Burraco et al. 2020).

96 Emerging infectious diseases represent another serious threat to amphibians (Harvell et al.  
97 2002, Pounds et al. 2006). Due to repeated introductions arising from human activities (Lips  
98 2016, O’Hanlon et al. 2018), chytridiomycosis caused by the chytrid fungi *Batrachochytrium*  
99 *dendrobatidis* (*Bd*) and *Batrachochytrium salamandrivorans* (*Bsal*) (Van Rooij et al. 2015) has  
100 already led to the decline or extinction of several hundred species and continues to cause mass  
101 mortality events on five continents (Scheele et al. 2019). Since *Bsal* was only discovered eight  
102 years ago (Martel et al. 2013) and its known geographic distribution is much smaller (Spitzen-  
103 van der Sluijs et al. 2016), we focus here on the much better known and more widespread *Bd*.

104 The fungus infects keratinous epidermal layers of the skin with waterborne motile zoospores  
105 (Berger et al. 1998), impairs its osmoregulatory function, which leads to shifts in electrolyte  
106 balance that can ultimately result in cardiac asystolic death in metamorphosed anurans (Voyles et  
107 al. 2009). Tadpoles exhibit keratinous elements only in their mouthparts; therefore they are less  
108 susceptible to *Bd* infection than subsequent life stages (Marantelli et al. 2004, Blaustein et al.  
109 2005). Nonetheless, it is often the early ontogeny (larval and metamorphic stages) when  
110 individuals become infected, due to their aquatic lifestyle (Kilpatrick et al. 2010). The thermal  
111 optimum of this cold-adapted fungus is between 18-24 °C, and its growth ceases above 27-28 °C  
112 (Cohen et al. 2017, Voyles et al. 2017), while the vast majority of amphibian species can survive  
113 temperatures above 30 °C (Ultsch et al. 1999, Sunday et al. 2011). Consequently, when and  
114 wherever microclimatic conditions allow amphibians to sufficiently raise their body temperature  
115 via thermoregulation, *Bd* infection prevalence and intensity are low (Richards-Zawacki 2010,  
116 Forrest and Schlaepfer 2011, Becker et al. 2012), and mass mortalities typically only occur in  
117 constantly cool environments (Berger et al. 2004, Woodhams and Alford 2005). Accordingly,  
118 thermal treatment of amphibians with 28 °C and higher for a few days can be effectively applied  
119 for *Bd*-disinfection of larval, juvenile or adult amphibians in captive populations (Woodhams et  
120 al. 2003, Retallick and Miera 2007, Chatfield and Richards-Zawacki 2011, Geiger et al. 2011,  
121 McMahon et al. 2014) and may also prove effective for fighting *Bd in situ* (Hettyey et al. 2019).

122 Based on the above information, heat waves may exert several opposing effects on  
123 developing amphibians, which may be beneficial for combating *Bd* but harmful for other fitness-  
124 related traits. Heat waves usually last for only a couple of days, and just a few days of heat  
125 treatment can be sufficient for the suppression or even the complete clearance of cold-adapted  
126 pathogens, such as *Bd* (Woodhams et al. 2003, Retallick and Miera 2007, McMahon et al. 2014).

127 However, we still know little about the developmental costs of brief periods of high temperatures  
128 for larval amphibians because most experiments that investigated the effects of heat on larval  
129 fitness exposed animals to heat chronically for several weeks, and the effects of shorter heat  
130 pulses are rarely tested (Mikó et al. 2021). Because the effects of high temperatures are likely to  
131 depend on the intensity, timing and duration of exposure, and may differ between species,  
132 studies focusing on these sources of variation are necessary to assess potential malign impacts of  
133 heat waves on amphibians and uncover hidden risks arising from thermal treatment of diseased  
134 animals.

135 In this study, we experimentally investigated the developmental effects of six-day long  
136 exposures to 28 and 30 °C during early, mid, and late larval development of two amphibian  
137 species. We assessed the effects of these experimental heat waves on the survival, growth,  
138 somatic and sexual development of agile frogs (*Rana dalmatina*; Bonaparte, 1840) and common  
139 toads (*Bufo bufo*; Linnaeus, 1758). These two species are common in Europe, they inhabit  
140 various types of water bodies, have different thermal optima (Morand et al. 1997) and represent  
141 two globally widespread families (Bufonidae and Ranidae). The temperatures we applied occur  
142 during heat waves in aquatic habitats of amphibian larvae in the temperate climate zone  
143 (Lambert et al. 2018, Lindauer et al. 2020) and are also recommended for thermal treatment of  
144 diseased amphibians (Chatfield and Richards-Zawacki 2011, McMahon et al. 2014, Cohen et al.  
145 2017, Hettyey et al. 2019). Thus, our aim was twofold: to reveal developmental effects of heat  
146 waves that may occur in natural habitats, and to assess possible negative consequences of  
147 thermal treatment applied against cold-adapted pathogens.

148

149 Methods



150 *Experimental procedures*

151 In March 2019, we collected 50 eggs from each of 12 freshly laid egg clutches of the agile frog  
152 from three ponds in the Pilis-Visegrádi Mountains, Hungary (Katlan: 47.71110° N, 19.04570° E,  
153 Ilona-tó: 47.71326° N, 19.04050° E, and Apátkúti pisztrángos: 47.76656° N, 18.98121° E; four  
154 clutches from each population). We transported the eggs to the Experimental Station of the Plant  
155 Protection Institute in Julianna-major, Budapest, and placed each clutch (family hereafter) into a  
156 plastic container (24 × 16 × 13 cm) filled with 1.3 L continuously aerated reconstituted soft water  
157 (RSW; APHA et al. 1992, USEPA 2002). In the laboratory, we maintained  $16.3 \pm 0.3$  °C (mean  
158  $\pm$  SD) and the lighting was adjusted weekly to outdoor conditions, starting with 12:12 h  
159 light:dark cycles in late March, which we gradually changed to 14:10 h by the end of April. In  
160 April, we collected 50 eggs from each of 12 freshly laid egg strings of the common toad from  
161 two ponds in the Pilis-Visegrádi Mountains (Apátkúti tározó: 47.77444° N, 18.98624° E, and  
162 Határréti tó: 47.64644° N, 18.90920° E) and one pond in Budapest (Hidegkúti horgásztó:  
163 47.56942° N, 18.95509° E), i.e. four clutches from each population. We housed common toad  
164 eggs as described above for agile frogs.

165 Four days after hatching, when all individuals reached the free-swimming stage  
166 (development stage 25; according to Gosner 1960), we started the experiment by haphazardly  
167 selecting 36 healthy-looking larvae from each family (36 individuals × 12 families = 432  
168 individuals per species). Tadpoles not used in the experiment were released at the site of their  
169 origin. We reared tadpoles individually in opaque plastic containers (18 × 13 × 12 cm) filled with  
170 1 L RSW, arranged in a randomised block design, where each block contained members of one  
171 family. Air temperature in the laboratory was  $20.1 \pm 1.1$  °C resulting in  $19.0 \pm 0.2$  °C water

172 temperature in tadpole containers. We changed water in the tadpole rearing containers twice a  
173 week and fed tadpoles *ad libitum* with slightly boiled, chopped spinach.

174 We exposed tadpoles to 19 (unheated control), 28, or 30 °C water temperature for six days,  
175 starting 6, 12, or 18 days after hatching (Fig. 1). Thus, thermal treatments were applied during  
176 three ontogenetic periods: in early, mid, and late larval stages (hereafter 1<sup>st</sup>, 2<sup>nd</sup> and 3<sup>rd</sup> larval  
177 period). This resulted in nine treatments with 48 replicates (4 individuals per family × 12  
178 families) in each treatment for each species. In agile frogs, data from the 19 and 30 °C treatments  
179 presented here were also used (combined with data from additional treatment groups) for testing  
180 another *a-priori* study question, which we published elsewhere (Mikó et al. 2021). We  
181 performed thermal treatments in a separate room adjacent to the room where we reared tadpoles.  
182 Lighting conditions and room temperature were set to be identical in the two rooms. Immediately  
183 before starting thermal treatments, we performed a water change and topped up the RSW to  
184 reach a depth of 10 cm (1.7 L RSW in each container during treatment). We placed the  
185 containers in 80 × 60 × 12 cm trays filled with tap water to a depth of 8 cm (to avoid floating of  
186 the rearing containers), and started to heat the water in the trays to the treatment-specific  
187 temperature using thermostated aquarium heaters (Tetra HT 200 in 28 °C treatments and Tetra  
188 HT 300 in 30 °C treatments, Tetra GmbH, Melle, Germany). Thereby, water temperature  
189 increased gradually to the desired level in ca. two hours, allowing tadpoles to adapt. Opposite to  
190 heaters, we placed water pumps (Tetra WP 300) to ensure homogeneous water temperatures,  
191 resulting in < 0.5 °C difference among tadpole containers within trays. Overall, this resulted in  
192 28.1 ± 0.4 and 30.0 ± 0.3 °C (mean ± SD) in heated tadpole containers in respective treatments  
193 (for details on temperature setting and validation, see the electronic Supporting Information; Fig  
194 S1, Table S1). Each tray hosted twelve containers, one from each family (Fig S2), resulting in

195 four trays in each thermal treatment at a time. During the treatment period, we changed water in  
196 the tadpole containers every other day with aerated RSW pre-heated to the treatment-specific  
197 temperature, and fed tadpoles with a reduced (ca. 1/3) amount of spinach to prevent water  
198 fouling and anoxia. Control individuals experienced the same handling and treatment conditions,  
199 except that their trays lacked heaters. At the end of the six-day long thermal treatment periods,  
200 we changed water with 1 L heated and aerated RSW, removed the containers from the trays and  
201 placed them back into their original position in the laboratory, allowing tadpoles to cool down  
202 gradually.

203       After the last thermal treatments, when tadpoles approached metamorphosis, we checked  
204 all rearing containers daily. When an individual started to metamorphose (emergence of  
205 forelimbs; development stage 42), we measured its body mass to the nearest 0.1 mg with an  
206 analytical balance (Ohaus Pioneer PA-114, Ohaus Europe Gmb, Nanikon, Switzerland), replaced  
207 its rearing water with 0.1 L fresh RSW, lifted one side of the container by ca. 2 cm to provide the  
208 metamorphs with both water and a dry surface, and covered the container with a transparent,  
209 perforated lid. When metamorphosis was completed (complete tail resorption; development stage  
210 46), we placed the individual into a new, lidded container of the same size as before, equipped  
211 with wet paper towel lining and a piece of cardboard egg-holder as a shelter. Twice a week, we  
212 fed froglets *ad libitum* with small crickets (*Acheta domestica*, instar stage 1-2) sprinkled with a  
213 3:1 mixture of Reptiland 76280 (Trixie Heimtierbedarf GmbH & Co. KG, Tarp, Germany) and  
214 Promotor 43 (Laboratorios Calier S.A., Barcelona, Spain) to provide the necessary vitamins,  
215 minerals and amino acids. Due to their smaller size, we fed toadlets with springtails (*Folsomia*  
216 sp.) in the first three weeks after metamorphosis, and switched to crickets afterwards. For each

217 individual we recorded the dates of starting metamorphosis, completion of tail resorption, and  
218 eventual mortality.

219       Between 6-8 (for agile frogs) or 9-12 (for common toads) weeks after metamorphosis  
220 (depending on species and development), when gonads became sufficiently differentiated and  
221 easy to observe (Ogielska and Kotusz 2004, Nemesházi et al. 2020), we measured body mass to  
222 the nearest 0.01 g and euthanized juvenile individuals in a water bath containing 6.6 g/L tricaine-  
223 methanesulfonate (MS-222) buffered to neutral pH with the same amount of Na<sub>2</sub>HPO<sub>4</sub>. We  
224 dissected the animals and examined the internal organs under an Olympus SZX12  
225 stereomicroscope (Olympus Europa SE & Co. KG, Hamburg, Germany) at 16× magnification  
226 and assigned fat bodies into one of four ordinal categories based on their size: lacking, small,  
227 regular-sized, or large. We also categorised phenotypic sex as male (testes), female (ovaries) or  
228 uncertain (abnormally looking gonads). Because many animals' guts contained food remains, we  
229 cut out the entire digestive tract, measured its mass to the nearest 0.01 g, and subtracted it from  
230 the body mass of juveniles to obtain 'net body mass'. We removed both feet of euthanized agile  
231 frogs and stored them in 96 % ethanol until DNA analyses.

232       We extracted DNA from agile frog foot samples with Geneaid Genomic DNA Extraction  
233 Kit for animal tissue (Thermo Fisher Scientific, Waltham USA) following the manufacturer's  
234 protocol, except that digestion time was 2 hours. We used a recently developed molecular marker  
235 set for genetic sexing validated on agile frog populations in Hungary (Nemesházi et al. 2020).  
236 We first tested all froglets for the Rds3 marker ( $\geq 95$  % sex linkage) applying high-resolution  
237 melting (HRM). We considered an individual to be concordant male or female if its Rds3  
238 genotype was in accordance with its phenotypic sex. Individuals that appeared to be sex-reversed  
239 based on the Rds3 marker were also tested using PCR for Rds1 ( $\geq 89$  % sex linkage). For a

240 detailed description of HRM and PCR methods, see Nemesházi et al. (2020). When both markers  
241 congruently suggested sex reversal, we considered the given individuals to be sex-reversed. In  
242 case of contradiction between the results of analyses based on Rds1 and Rds3, we considered  
243 genetic sex to be unknown (Table S2). We did not investigate sex reversal in common toads  
244 because phenotypic sex ratios suggested no treatment effects on sex (see Results).

245

#### 246 *Statistical analyses*

247 We analysed the data of the two species separately. We assessed treatment effects on survival,  
248 length of larval development, body mass at metamorphosis, net body mass at dissection, size of  
249 fat bodies, and phenotypic sex ratio. For each dependent variable, we ran a model (see model  
250 specifications below) with temperature and treatment period as categorical fixed factors and their  
251 interaction, the difference between the mean temperature in each tadpole container and the  
252 nominal temperature of the given treatment (measured as described in the electronic Supporting  
253 Information) as a numeric covariate, and family nested in population as random factors. We  
254 tested the effect of temperature within each treatment period by calculating pre-planned linear  
255 contrasts (Ruxton and Beauchamp 2008), correcting the significance threshold for multiple  
256 testing using the false discovery rate (FDR) method (Pike 2011). All analyses were conducted in  
257 'R' (version 3.6.2), with the 'emmeans' package for linear contrasts.

258 For the analysis of survival, we used Cox's proportional hazards model (R package  
259 'coxme'). Individuals were divided into five ordered categories; 1: died during treatment, 2: died  
260 after treatment, but before the start of metamorphosis, 3: died during metamorphosis, 4: died  
261 after metamorphosis, but before dissection, 5: survived until dissection. Animals that died before  
262 the treatment (four agile frog and five common toad larvae) were excluded from survival

263 analyses. We entered the ordinal survival categories as the dependent variable and treated the  
264 fifth survival category as censored observations.

265 To analyse variation in the length of larval development, body mass at metamorphosis and  
266 net body mass at dissection, we used linear mixed-effects models (LMM; ‘lme’ function of the  
267 ‘nlme’ package), allowing the variances to differ among treatment groups (‘varIdent’ function)  
268 because graphical model diagnostics indicated heterogeneous variances. In the analysis of net  
269 body mass at dissection, we included age (number of days from finishing metamorphosis to  
270 dissection) as a further covariate. In the case of agile frogs, we entered the log-transformed  
271 values of the length of larval development to achieve normal distribution of model residuals. For  
272 the analysis of fat-body size, we applied cumulative link mixed models (CLMM; ‘clmm’  
273 function of ‘ordinal’ package; Christensen 2015), where we also entered age as a covariate.

274 To analyse phenotypic sex ratio, first, we excluded those few individuals the gonads of  
275 which were not unambiguously categorizable either as male or female (Table S2). Then we  
276 analysed the proportion of phenotypic males using phenotypic sex as a binary response variable  
277 in generalised linear mixed modelling procedures (GLMM) with binomial error distribution and  
278 logit link (‘glmmTMB’ function of the ‘glmmTMB’ package; Brooks et al. 2017). To analyse  
279 sex reversal in agile frogs, we could not apply the same modelling framework as for sex ratios  
280 because of separation, i.e. sex-reversed individuals were absent in certain treatment groups  
281 whereas in some others there was 100% sex reversal. Therefore, we applied six separate analyses  
282 comparing the two elevated temperature treatments to their associated controls in each of the  
283 three ontogenetic periods using Fisher’s exact tests. The dependent variable was phenotype, i.e.  
284 whether or not the individual was sex-reversed. We restricted these analyses to genetic females

285 since heat induces female-to-male sex reversal, and we detected no male-to-female sex reversal.  
286 Because of multiple testing, we corrected  $P$  values using the FDR method.

287

## 288 Results

289 Survival of agile frogs that were exposed to 30 °C during either the 1<sup>st</sup> or the 2<sup>nd</sup> larval period  
290 was significantly reduced (by 56 and 17 %, respectively; Fig. 2, Table 1, Table S3). Survival of  
291 common toads also significantly decreased upon exposure to 30 °C (by ca. 33 %), but only if this  
292 temperature was applied during the 2<sup>nd</sup> larval period (Fig.2, Table 2). Thermal treatments that  
293 exposed tadpoles to 30 °C in other larval periods (3<sup>rd</sup> in both species and 1<sup>st</sup> in common toads)  
294 and those involving 28 °C at any period did not affect survival in either species (Table 1-2).

295 Length of larval development of agile frogs was significantly prolonged by all thermal  
296 treatments applied in all larval periods (Fig. 3, Table 1 and S3). By contrast, in common toads,  
297 the length of larval development was not affected when tadpoles were exposed to 28 °C during  
298 the 1<sup>st</sup> larval period, but larvae that were exposed to this temperature during the 2<sup>nd</sup> and 3<sup>rd</sup> larval  
299 period developed faster compared to their control groups (Fig. 4, Table 2 and S3). When  
300 common toad tadpoles were exposed to 30 °C, their larval development was only shortened upon  
301 exposure during the 3<sup>rd</sup> larval period but remained unaffected if treated in the 1<sup>st</sup> or 2<sup>nd</sup> larval  
302 period (Fig 4, Table 2 and S3).

303 Body mass at metamorphosis was significantly reduced in agile frogs by the 28 °C thermal  
304 treatment if applied during the 1<sup>st</sup> larval period but was not affected if 28 °C was applied later on  
305 (Fig 3, Table 1). Exposure to 30 °C tended to decrease body mass at metamorphosis when  
306 applied in the 1<sup>st</sup> larval period and exerted a significant negative effect during the 2<sup>nd</sup> and 3<sup>rd</sup>  
307 larval period (Fig 3, Table 1 and S3). In common toads, both thermal treatments applied in all

308 larval periods resulted in significantly reduced body mass at metamorphosis (Fig 4, Table 2 and  
309 S3).

310 At dissection, net body mass of juvenile agile frogs was only increased in animals treated  
311 with 30 °C during the 2<sup>nd</sup> larval period, but remained unaffected in all other treatment groups  
312 (Fig 3, Table 1 and S3). Thermal treatments applied in any larval period did not affect the net  
313 body mass of common toads (Fig 4, Table 2 and S3). The number of days between  
314 metamorphosis and dissection positively affected net body mass at dissection in both species  
315 (Table S3).

316 The size of fat bodies was significantly smaller in juvenile agile frogs as a result of both  
317 thermal treatments, but only upon exposure during the 1<sup>st</sup> larval period and not during later  
318 periods (Fig 3, Table1). In juveniles of the common toad the size of fat bodies was unaffected by  
319 thermal treatments applied in any larval period (Fig 4, Table 2), and positively correlated with  
320 the age of juveniles (Table S3).

321 Phenotypic sex ratio in agile frogs was affected by exposure to elevated temperature:  
322 exposure to 28 °C during the 3<sup>rd</sup> larval period (but not in the earlier periods) caused a significant  
323 shift towards a male-biased sex ratio, and treatment with 30 °C in all larval periods resulted in  
324 highly male-biased sex ratios (Fig 3, Table 1, S2 and S3). Accordingly, the proportion of agile  
325 frog individuals that underwent heat-induced sex reversal was significantly higher (between 30  
326 and 100 % of genetic females) at both temperatures and in all treatment periods compared to the  
327 respective control groups ( $\leq 4.5$  %, all  $P \leq 0.012$ ; Fig 3, Table S2). In contrast, none of the  
328 thermal treatments applied in either larval period had any effect on the phenotypic sex ratio of  
329 juvenile common toads (Fig 4, Table 2, S2 and S3).

330



331 Discussion

332 Our results demonstrate that high temperatures experienced for six days during larval  
333 development can negatively affect the survival, growth, somatic and sexual development of  
334 amphibians, but the severity of these effects depends on the intensity and timing of thermal stress  
335 and can largely differ between species. Agile frogs proved to be more sensitive: in this species,  
336 all studied variables were affected by one or more heat treatments, and almost all of the resulting  
337 changes are likely disadvantageous for individual fitness and population viability (Fig. 5). In  
338 contrast, for common toads, the only consistent effect of thermal stress was reduced mass at  
339 metamorphosis and, in a few treatments, faster larval development, while we observed barely  
340 any effect on survival and no lasting developmental effects in juveniles (Fig. 5). These results  
341 highlight that even sympatric species that are relatively similar in their ecology may be affected  
342 very differently by heat waves.

343 Survival rate in both species was decreased by exposure to 30 °C, but only if tadpoles  
344 experienced it relatively early on during their development (during 1<sup>st</sup> and 2<sup>nd</sup> larval periods).  
345 Temperatures of around 30 °C throughout the entire larval development often resulted in  
346 decreased survival in earlier studies (Bellakhal et al. 2014, Goldstein et al. 2017, Phuge 2017,  
347 Lambert et al. 2018). Our results suggest that the adverse effect of elevated temperature on larval  
348 survival depends on the species and on the timing of exposure, indicating a peak in  
349 thermosenitivity during the early stages of larval development (in addition to the increased  
350 thermosenitivity of the final larval stages, directly before the onset of metamorphosis (Floyd  
351 1983), which we did not study). This is in line with many previous studies suggesting that the  
352 earliest life stages of amphibians are the most susceptible to several stress factors such as  
353 chemicals, parasites, poor environmental conditions and pesticides (Ortiz-Santaliestra et al. 2006,

354 Holland et al. 2007, Crespi and Warne 2013, Mikó et al. 2017). The energetically costly cellular  
355 repairing mechanisms and the maintenance and restoration of homeostasis during and after  
356 thermal stress compromise higher-level functions that are necessary for survival (Williams et al.  
357 2016). Furthermore, dissolved oxygen level in the water decreases with rising temperature  
358 (Stefan et al. 2001, Fang and Stefan 2009), which in turn can cause hypoxia and oxidative stress  
359 in tadpoles (Lushchak 2011, Freitas and Almeida 2016). High temperature may also accelerate  
360 bacterial bloom in the water (Ferreira and Chauvet 2011), potentiating the accumulation of  
361 opportunistic pathogens. All of these processes might contribute to mortality observed in  
362 experiments involving thermal treatments and, under natural conditions, during or after heat  
363 waves.

364       Timing of metamorphosis and body mass at metamorphosis are crucial components of  
365 fitness in amphibians. Earlier metamorphosis allows for leaving the more hazardous aquatic  
366 environment faster (Denver 1997), and allows for a longer post-metamorphic growth period  
367 compared to late-metamorphosing individuals, which in turn leads to increased survival during  
368 the first hibernation (Altwegg and Reyer 2003, Üveges et al. 2016). In the present study, the  
369 simulated heat waves prolonged larval development in agile frogs but shortened it (when heat  
370 was experienced in the late larval period) in common toads, whereas mass at metamorphosis  
371 decreased after heat exposure in both species (although in agile frogs the latter effect was only  
372 significant in a few treatment groups). According to the temperature-size rule (Kozłowski et al.  
373 2004), high temperatures are associated with increased metabolic rates and accelerated  
374 development in larval anurans (Álvarez and Nicieza 2002, McLeod et al. 2013, Courtney Jones  
375 et al. 2015), which results in earlier metamorphosis at a smaller body size (Laugen et al. 2003,  
376 Niehaus et al. 2006). Our results likely documented this relationship between development and

377 growth in common toads. However, in agile frogs, this relationship was disrupted by heat  
378 treatments, most probably because the applied temperatures acted as severe stressors. This result  
379 aligns with the observation that larvae of the common toad are more thermophilic than those of  
380 agile frogs, as suggested by a higher critical thermal maximum and higher preferred temperatures  
381 in the former than in the latter (Hettyey, personal communication).

382       Stress experienced early in life can have long-lasting consequences, such as small adult  
383 size and limited energy reserves (Crespi and Warne 2013, Jonsson and Jonsson 2014). However,  
384 in our study, the reduced mass at metamorphosis in heat-treated groups did not persist into  
385 juvenility: after a few months of post-metamorphic growth, we found no differences in body  
386 mass or fat reserves in either species. There were only two exceptions to this: in juvenile agile  
387 frogs, fat bodies were smaller if they received either heat treatment in the 1<sup>st</sup> larval period, and  
388 unexpectedly, their body mass was larger after exposure to 30 °C applied during the 2<sup>nd</sup> larval  
389 period. The death of lighter individuals likely contributed to the equalization of juvenile body  
390 mass among treatment groups, given that most individuals that died between the onset of  
391 metamorphosis and dissection had a lower body mass at metamorphosis than conspecifics that  
392 survived until the end of the experiment in both species (Welch's tests; agile frogs:  $t = -3.54$ ,  $df =$   
393  $32.0$ ,  $P = 0.001$ , common toads:  $t = -9.30$ ,  $df = 53.9$ ,  $P < 0.001$ ). A further contributing factor  
394 may be compensatory growth (Squires et al. 2010, Hector et al. 2012). Nonetheless,  
395 compensatory growth can have hidden costs (Stoks et al. 2006, De Block and Stoks 2008,  
396 Murillo-Rincón et al. 2017), so that the lack of among-treatment differences in juvenile mass  
397 does not necessarily indicate the absence of long-term malign consequences of high temperatures  
398 experienced during larval life. Indeed, the majority of juvenile agile frogs completely lacked fat  
399 bodies if they were exposed to heat during the 1<sup>st</sup> larval period. Fat bodies in amphibians are

400 major energy stores that are vital to survival (Scott et al. 2007) and regulate processes related to  
401 reproduction (Pierantoni et al. 1983, Girish and Saidapur 2000). Consequently, high  
402 temperatures experienced during early ontogeny may have long-lasting negative effects on the  
403 survival and reproductive potential of agile frogs, which may compromise population  
404 persistence. The observation that the size of fat bodies was not affected by thermal treatments in  
405 common toads confirms that these are more tolerant to high temperatures than agile frogs, and,  
406 more generally, reinforces the hypothesis that there is large among-species variation also in the  
407 long-term consequences of thermal stress.

408         Sex reversal can occur naturally in wild populations of agile frogs (Nemesházi et al. 2020)  
409 and other species (Alho et al. 2010, Lambert et al. 2019, Xu et al. 2021), but high temperature  
410 can increase its frequency in a wide range of ectothermic vertebrates (Baroiller and D’Cotta  
411 2016, Ruiz-García et al. 2021, Whiteley et al. 2021). In our study, six-day 30 °C heat waves  
412 caused male-biased sex ratios via sex reversal in agile frogs, and the same effect was induced by  
413 exposure to 28 °C in the 3<sup>rd</sup> larval period. These results align with previous studies documenting  
414 altered sex ratios in several anuran species where larvae were raised at high temperatures  
415 throughout their development (Ruiz-García et al. 2021), and additionally suggest that the  
416 sensitivity of sex determination to elevated temperature increases close to the end of larval  
417 development. Our findings caution that heat waves lasting for only a few days during tadpole  
418 development can trigger sex reversal, which may have wide-ranging consequences including  
419 skewed sex ratios and lowered population viability (Bókony et al. 2017, Wedekind 2017,  
420 Nemesházi et al. 2021). However, our observation that the same thermal treatments did not affect  
421 phenotypic sex ratios in common toads suggests that there is considerable interspecific variation  
422 in the thermosensitivity of sexual development.

423 Heat treatment is a promising mitigation method against amphibian chytridiomycosis  
424 (Chatfield and Richards-Zawacki 2011, Geiger et al. 2011, Hettyey et al. 2019). Our results,  
425 however, underline the importance of pre-assessing the thermal sensitivity of each species,  
426 including that of their sexual development. Based on our results, thermal treatment at 30 °C  
427 could be applied for six days to common toads, which would likely lead to *Bd* clearance, or at  
428 least to a drastic suppression of *Bd* growth (Retallick and Miera 2007, Chatfield and Richards-  
429 Zawacki 2011, Geiger et al. 2011). This treatment could be recommended in specific situations,  
430 such as epizootic outbreaks, when the benefits clearly outweigh the costs arising from decreased  
431 body mass at metamorphosis, or when the latter can be compensated for (e.g. by supplemental  
432 feeding). In agile frogs, treatment with 28 °C during the 2<sup>nd</sup> larval period (days 12-18 after  
433 hatching) was the only treatment combination without adverse effects on most life-history traits  
434 and sexual development. Although this treatment also caused somewhat lengthened larval  
435 development, this cost may be negligible (especially so in captivity) considering the benefit of  
436 *Bd* clearance. Whether treatment with temperatures lower than 28 °C would be applicable  
437 without costs and still suppresses *Bd* growth sufficiently needs further investigation (Hettyey et  
438 al. 2019). A further possibility to explore is that under controlled conditions, capitalising on the  
439 feminizing effect of estrogens or other estrogenic chemicals might make thermal treatment of  
440 *Bd*-infected animals potentially suitable also for species with thermally sensitive sex  
441 determination (Kitano et al. 2012).

442 In conclusion, our study demonstrates that species can differ in a multitude of ways in how  
443 they are affected by short periods of elevated temperatures which are similar in magnitude to  
444 those occurring in natural water bodies during heat waves. Most importantly, we demonstrate  
445 that already 28 °C can have surprisingly severe consequences for larvae of a thermosensitive

446 anuran, where the strength of effects depends largely on the developmental stage of individuals  
447 that become exposed to the heat. At the same time, even 30 °C experienced any time during  
448 larval development does little harm to individuals of another sympatric species. Such species-  
449 specific differences should be examined in a wide range of taxa and considered when evaluating  
450 the impact of climate change on amphibians, and also in the development of mitigating methods  
451 against chytridiomycosis.

452

453 *Acknowledgements* - We are thankful to Zsófia Boros, Dóra Holly, Boglárka Jaloveczki, Csenge  
454 Kalina, Eszter Náday-Szabó, Stephanie Orf and Gergely Tarján for their help during the  
455 experiment and data archiving. We thank Gergő Tholt and the NÖVI Department of Zoology for  
456 providing us with their stereomicroscope and camera. Bálint Bombay made the paintings of  
457 tadpoles and juvenile frogs. The study was funded by the Lendület Programme of the Hungarian  
458 Academy of Sciences (MTA, LP2012-24/2012), an FP7 Marie Curie Career Integration Grant  
459 (PCIG13-GA-2013-631722) and the National Research, Development and Innovation Office of  
460 Hungary (NKFIH, grants 115402 and 135016 to V.B., 124708 to O.I.H., and 124375 to A.H.).  
461 The authors were supported by the János Bolyai Research Scholarship of the Hungarian  
462 Academy of Sciences (to V.B., A.H., and O.I.H.), the New National Excellence Program of the  
463 Ministry for Innovation and Technology from the source of the National Research, Development  
464 and Innovation Fund (ÚNKP-20-5 and ÚNKP-21-5 to V.B. and A.H., ÚNKP-19-4 to A.H.,  
465 ÚNKP-21-4 to J.U., and ÚNKP-19-3, ÚNKP-20-3, ÚNKP-21-3 to A.K.), the Ministry of Human  
466 Capacities (National Program for Talent of Hungary, NTP-NFTÖ-18-B-0412 to V.V., NTP-  
467 NFTÖ-17-B-0317 to E.N.), and the Austrian Agency for International Cooperation in Education  
468 & Research (OeAD-GmbH; ICM-2019-13228 to E.N.). N.U. and D.H. were supported by the

469 Young Investigators Programme of the Hungarian Academy of Sciences. Experimental  
470 procedures were approved by the Ethical Commission of the Plant Protection Institute, and  
471 permissions were issued by the Government Agency of Pest County (PE/KTF/3596-6/2016,  
472 PE/KTF/3596-7/2016 and PE/KTF/3596-8/2016). The experiments were carried out according to  
473 recommendations of the EC Directive 86/609/EEC for animal experiments  
474 (<http://europa.eu.int/scadplus/leg/en/s23000.htm>).

475 The authors have no conflict of interest to declare.

476

477 *Data availability statement* - The data that support the findings of this study are openly available  
478 in figshare at <http://doi.org/10.6084/m9.figshare.17197847>.

479

#### 480 References

- 481 Alho, J. S. et al. 2010. Sex reversal and primary sex ratios in the common frog (*Rana*  
482 *temporaria*). - Mol. Ecol. 19: 1763–1773.
- 483 Altwegg, R. and Reyer, H.-U. 2003. Patterns of natural selection on size at metamorphosis in  
484 water frogs. - Evolution (N. Y). 57: 872–882.
- 485 Álvarez, D. and Nicieza, A. G. 2002. Effects of temperature and food quality on anuran larval  
486 growth and metamorphosis. - Funct. Ecol. 16: 640–648.
- 487 APHA et al. 1992. Standard methods for the examination of water and wastewater - American  
488 Public Health Association, American Water Works Association, Water Environment  
489 Federation. - American Public Health Association.
- 490 Arnfield, A. J. 2003. Two decades of urban climate research: A review of turbulence, exchanges  
491 of energy and water, and the urban heat island. - Int. J. Climatol. 23: 1–26.
- 492 Baroiller, J. F. and D’Cotta, H. 2016. The reversible sex of gonochoristic fish: Insights and  
493 consequences. - Sex. Dev. 10: 242–266.
- 494 Becker, C. G. et al. 2012. Disease Risk in temperate amphibian populations is higher at closed-  
495 canopy sites. - PLoS One 7: e48205.
- 496 Bellakhal, M. et al. 2014. Effects of temperature, density and food quality on larval growth and  
497 metamorphosis in the north African green frog *Pelophylax saharicus*. - J. Therm. Biol. 45:  
498 81–86.
- 499 Berger, L. et al. 1998. Chytridiomycosis causes amphibian mortality associated with population  
500 declines in the rain forests of Australia and Central America. - Proc. Natl. Acad. Sci. U. S.  
501 A. 95: 9031–9036.
- 502 Berger, L. et al. 2004. Effect of season and temperature on mortality in amphibians due to

- 503 chytridiomycosis. - Aust. Vet. J. 82: 31–36.
- 504 Blaustein, A. R. et al. 2001. Amphibian breeding and climate change. - Conserv. Biol. 15: 1804–  
505 1809.
- 506 Blaustein, A. R. et al. 2005. Interspecific variation in susceptibility of frog tadpoles to the  
507 pathogenic fungus *Batrachochytrium dendrobatidis*. - Conserv. Biol. 19: 1460–1468.
- 508 Blaustein, A. R. et al. 2010. Direct and indirect effects of climate change on amphibian  
509 populations. - Diversity 2: 281–313.
- 510 Bókony, V. et al. 2017. Climate-driven shifts in adult sex ratios via sex reversals: The type of sex  
511 determination matters. - Philos. Trans. R. Soc. B Biol. Sci. 372: 20160325.
- 512 Brans, K. I. et al. 2018. Urban hot-tubs: Local urbanization has profound effects on average and  
513 extreme temperatures in ponds. - Landsc. Urban Plan. 176: 22–29.
- 514 Brooks, M. E. et al. 2017. glmmTMB balances speed and flexibility among packages for zero-  
515 inflated generalized linear mixed modeling. - R J. 9: 378–400.
- 516 Burraco, P. et al. 2020. Climate change and ageing in ectotherms. - Glob. Chang. Biol. 26: 5371–  
517 5381.
- 518 Campbell Grant, E. H. et al. 2016. Quantitative evidence for the effects of multiple drivers on  
519 continental-scale amphibian declines. - Sci. Rep. 6: 25625.
- 520 Carreira, B. M. et al. 2020. Heat waves trigger swift changes in the diet and life-history of a  
521 freshwater snail. - Hydrobiologia 847: 999–1011.
- 522 Ceballos, G. et al. 2015. Accelerated modern human-induced species losses: Entering the sixth  
523 mass extinction. 1: e1400253.
- 524 Chatfield, M. W. H. and Richards-Zawacki, C. L. 2011. Elevated temperature as a treatment for  
525 *Batrachochytrium dendrobatidis* infection in captive frogs. - Dis. Aquat. Organ. 94: 235–  
526 238.
- 527 Christensen, R. H. B. 2015. A tutorial on fitting Cumulative Link Mixed Models with clmm2  
528 from the ordinal package.: 1–18.
- 529 Clarke, A. and Pörtner, H.-O. 2010. Temperature, metabolic power and the evolution of  
530 endothermy. - Biol. Rev. 85: 703–727.
- 531 Cohen, J. M. et al. 2017. The thermal mismatch hypothesis explains host susceptibility to an  
532 emerging infectious disease. - Ecol. Lett. 20: 184–193.
- 533 Cohen, J. M. et al. 2019. An interaction between climate change and infectious disease drove  
534 widespread amphibian declines. - Glob. Chang. Biol. 25: 927–937.
- 535 Courtney Jones, S. K. et al. 2015. Long-term changes in food availability mediate the effects of  
536 temperature on growth, development and survival in striped marsh frog larvae: Implications  
537 for captive breeding programmes. - Conserv. Physiol. 3: 1–12.
- 538 Crespi, E. J. and Warne, R. W. 2013. Environmental conditions experienced during the tadpole  
539 stage alter post-metamorphic glucocorticoid response to stress in an amphibian. - Integr.  
540 Comp. Biol. 53: 989–1001.
- 541 De Block, M. and Stoks, R. 2008. Compensatory growth and oxidative stress in a damselfly. -  
542 Proc. Biol. Sci. 275: 781–785.
- 543 Denver, R. J. 1997. Proximate mechanisms of phenotypic plasticity in amphibian  
544 metamorphosis. - Am. Zool. 37: 172–184.
- 545 Dournon, C. et al. 1984. Cytogenetic and genetic evidence of male sexual inversion by heat  
546 treatment in the newt *Pleurodeles poireti*. - Chromosoma 90: 261–264.
- 547 Fang, X. and Stefan, H. G. 2009. Simulations of climate effects on water temperature, dissolved  
548 oxygen, and ice and snow covers in lakes of the contiguous United States under past and



- 549 future climate scenarios. - *Limnol. Oceanogr.* 54: 2359–2370.
- 550 Ferreira, V. and Chauvet, E. 2011. Synergistic effects of water temperature and dissolved  
551 nutrients on litter decomposition and associated fungi. - *Glob. Chang. Biol.* 17: 551–564.
- 552 Floyd, R. B. 1983. Ontogenetic change in the temperature tolerance of larval *Bufo marinus*  
553 (Anura: Bufonidae). - *Comp. Biochem. Physiol.* -- Part A Physiol. 75: 267–271.
- 554 Forrest, M. J. and Schlaepfer, M. A. 2011. Nothing a hot bath won't cure: Infection rates of  
555 amphibian chytrid fungus correlate negatively with water temperature under natural field  
556 settings. - *PLoS One* in press.
- 557 Freitas, J. S. and Almeida, E. A. 2016. Antioxidant defense system of tadpoles (*Eupemphix*  
558 *nattereri*) exposed to changes in temperature and pH. - *Zoolog. Sci.* 33: 186–194.
- 559 Gardner, J. et al. 2016. Individual and demographic consequences of reduced body condition  
560 following repeated exposure to high temperatures. - *Ecology* 97: 786–795.
- 561 Geiger, C. C. et al. 2011. Elevated temperature clears chytrid fungus infections from tadpoles of  
562 the midwife toad, *Alytes obstetricans*. - *Amphibia-Reptilia* 32: 276–280.
- 563 Girish, S. and Saidapur, S. K. 2000. Interrelationship between food availability, fat body, and  
564 ovarian cycles in the frog, *Rana tigrina*, with a discussion on the role of fat body in anuran  
565 reproduction. - *J. Exp. Zool.* 286: 487–493.
- 566 Goldstein, J. A. et al. 2017. The effect of temperature on development and behaviour of relict  
567 leopard frog tadpoles. - *Conserv. Physiol.* 5: 1–8.
- 568 Gosner, K. L. 1960. A simplified table for staging anuran embryos larvae with notes on  
569 identification. - *Herpetologica* 16: 183–190.
- 570 Harkey, G. A. and Semlitsch, R. D. 1988. Effects of temperature on growth, development, and  
571 color polymorphism in the Ornate chorus frog *Pseudacris ornata*. - *Copeia* 4: 1001–1007.
- 572 Harvell, C. D. et al. 2002. Climate warming and disease risks for terrestrial and marine biota. -  
573 *Science* (80-. ). 296: 2158–2162.
- 574 Hector, K. L. et al. 2012. Consequences of compensatory growth in an amphibian. - *J. Zool.* 286:  
575 93–101.
- 576 Hettyey, A. et al. 2019. Mitigating disease impacts in amphibian populations: Capitalizing on the  
577 thermal optimum mismatch between a pathogen and its host. - *Front. Ecol. Evol.* 7: 1–13.
- 578 Hof, C. et al. 2011. Additive threats from pathogens, climate and land-use change for global  
579 amphibian diversity. - *Nature* 480: 516–519.
- 580 Holland, M. P. et al. 2007. Echinostome infection in green frogs (*Rana clamitans*) is stage and  
581 age dependent. - *J. Zool.* 271: 455–462.
- 582 IUCN 2021. International Union for Conservation of Nature. -  
583 <https://www.iucnredlist.org/resources/summary-statistics> in press.
- 584 Jonsson, B. and Jonsson, N. 2014. Early environment influences later performance in fishes. - *J.*  
585 *Fish Biol.* 85: 151–188.
- 586 Juráni, M. et al. 1973. Effect of stress and environmental temperature on adrenal function in  
587 *Rana esculenta*. - *J. Endocrinology* 57: 385–391.
- 588 Kilpatrick, A. M. et al. 2010. The ecology and impact of chytridiomycosis: an emerging disease  
589 of amphibians. - *Trends Ecol. Evol.* 25: 109–118.
- 590 Kitano, T. et al. 2012. Estrogen rescues masculinization of genetically female medaka by  
591 exposure to cortisol or high temperature. - *Mol. Reprod. Dev.* 79: 719–726.
- 592 Kozłowski, J. et al. 2004. Can optimal resource allocation models explain why ectotherms grow  
593 larger in cold? - *Integr. Comp. Biol.* 44: 480–493.
- 594 Krockenberger, A. et al. 2012. The limit to the distribution of a rainforest marsupial folivore is

- 595 consistent with the thermal intolerance hypothesis. - *Oecologia* 168: 889–899.
- 596 Lambert, M. R. et al. 2018. Sexual and somatic development of wood frog tadpoles along a  
597 thermal gradient. - *J. Exp. Zool. Part A Ecol. Integr. Physiol.* 329: 72–79.
- 598 Lambert, M. R. et al. 2019. Molecular evidence for sex reversal in wild populations of green  
599 frogs (*Rana clamitans*). - *Peer J.* 7: e6449.
- 600 Laugen, A. T. et al. 2003. Latitudinal and temperature-dependent variation in embryonic  
601 development and growth in *Rana temporaria*. - *Oecologia* 135: 548–554.
- 602 Lindauer, A. L. et al. 2020. Daily fluctuating temperatures decrease growth and reproduction rate  
603 of a lethal amphibian fungal pathogen in culture. - *BMC Ecol.* 20: 1–9.
- 604 Lips, K. R. 2016. Overview of chytrid emergence and impacts on amphibians. - *Philos. Trans. R.*  
605 *Soc. B Biol. Sci.* 371: 20150465.
- 606 Lushchak, V. I. 2011. Environmentally induced oxidative stress in aquatic animals. - *Aquat.*  
607 *Toxicol.* 101: 13–30.
- 608 Marantelli, G. et al. 2004. Distribution of the amphibian chytrid *Batrachochytrium dendrobatidis*  
609 and keratin during tadpole development. - *Pacific Conserv. Biol.* 10: 173–179.
- 610 Martel, A. et al. 2013. *Batrachochytrium salamandrivorans* sp. nov. causes lethal  
611 chytridiomycosis in amphibians. - *Proc. Natl. Acad. Sci. U. S. A.* 110: 15325–15329.
- 612 McKechnie, A. and Wolf, B. 2019. The physiology of heat tolerance in small endotherms. -  
613 *Physiology* 34: 302–313.
- 614 McLeod, I. M. et al. 2013. Climate change and the performance of larval coral reef fishes: The  
615 interaction between temperature and food availability. - *Conserv. Physiol.* 1: 1–12.
- 616 McMahan, T. A. et al. 2014. Amphibians acquire resistance to live and dead fungus overcoming  
617 fungal immunosuppression. - *Nature* 511: 224–227.
- 618 Mikó, Z. et al. 2017. Age-dependent changes in sensitivity to a glyphosate-based pesticide in  
619 tadpoles of the common toad (*Bufo bufo*). - *Aquat. Toxicol.* 187: 48–54.
- 620 Mikó, Z. et al. 2021. Sex reversal and ontogeny under climate change and chemical pollution:  
621 are there interactions between the effects of elevated temperature and a xenoestrogen on  
622 early development in agile frogs? - *Environ. Pollut.* 285: 117464.
- 623 Monastersky, R. 2014. Biodiversity: Life a a status report. - *Nature* 516: 158–161.
- 624 Morand, A. et al. 1997. Phenotypic variation in metamorphosis in five anuran species along a  
625 gradient of stream influence. - *Comptes Rendus l'Académie des Sci. - Ser. III - Sci. la Vie /*  
626 *Life Sci.* 320: 645–652.
- 627 Murillo-Rincón, A. et al. 2017. Compensating for delayed hatching reduces offspring immune  
628 response and increases life-history costs. - *Oikos* 126: 565–571.
- 629 Narayan, E. J. and Hero, J.-M. 2014. Acute thermal stressor increases glucocorticoid response  
630 but minimizes testosterone and locomotor performance in the cane toad (*Rhinella marina*). -  
631 *PLoS One* 9: 1–6.
- 632 Nemesházi, E. et al. 2020. Novel genetic sex markers reveal high frequency of sex reversal in  
633 wild populations of the agile frog (*Rana dalmatina*) associated with anthropogenic land use.  
634 - *Mol. Ecol.* 29: 3607–3621.
- 635 Nemesházi, E. et al. 2021. Evolutionary and demographic consequences of temperature-induced  
636 masculinization under climate warming: the effects of mate choice. - *BMC Ecol. Evol.* 21:  
637 16.
- 638 Niehaus, A. C. et al. 2006. Short- and long-term consequences of thermal variation in the larval  
639 environment of anurans. - *J. Anim. Ecol.* 75: 686–692.
- 640 O'Hanlon, S. J. et al. 2018. Recent Asian origin of chytrid fungi causing global amphibian

- 641 declines. - *Science* (80-. ). 360: 621–627.
- 642 Ogielska, M. and Kotusz, A. 2004. Pattern and rate of ovary differentiation with reference to  
643 somatic development in Anuran amphibians. - *J. Morphol.* 259: 41–54.
- 644 Ortiz-Santaliestra, M. E. et al. 2006. Influence of developmental stage on sensitivity to  
645 ammonium nitrate of aquatic stages of amphibians. - *Environ. Toxicol. Chem.* 25: 105–111.
- 646 Oswald, S. et al. 2008. Heat stress in a high-latitude seabird: effects of temperature and food  
647 supply on bathing and nest attendance of great skuas *Catharacta skua*. - *J. Avian Biol.* 39:  
648 163–169.
- 649 Phuge, S. K. 2017. High temperatures influence sexual development differentially in male and  
650 female tadpoles of the Indian skipper frog, *Euphlyctis cyanophlyctis*. - *J. Biosci.* 42: 449–  
651 457.
- 652 Pierantoni, R. et al. 1983. Fat body and autumn recrudescence of the ovary in *Rana esculenta*. -  
653 *Comp. Biochem. Physiol.* -- Part A Physiol. 76: 31–35.
- 654 Pike, N. 2011. Using false discovery rates for multiple comparisons in ecology and evolution. -  
655 *Methods Ecol. Evol.* 2: 278–282.
- 656 Pounds, J. A. et al. 2006. Widespread amphibian extinctions from epidemic disease driven by  
657 global warming. - *Nature* 439: 161–167.
- 658 Retallick, R. W. R. and Miera, V. 2007. Strain differences in the amphibian chytrid  
659 *Batrachochytrium dendrobatidis* and non-permanent, sub-lethal effects of infection. - *Dis.*  
660 *Aquat. Organ.* 75: 201–207.
- 661 Richards-Zawacki, C. L. 2010. Thermoregulatory behaviour affects prevalence of chytrid fungal  
662 infection in a wild population of Panamanian golden frogs. - *Proc. R. Soc. B Biol. Sci.* 277:  
663 519–528.
- 664 Ruiz-García, A. et al. 2021. Sex differentiation in amphibians: Effect of temperature and its  
665 influence on sex reversal. - *Sex. Dev.* 15: 157–167.
- 666 Ruxton, G. D. and Beauchamp, G. 2008. Time for some a priori thinking about post hoc testing. -  
667 *Behav. Ecol.* 19: 690–693.
- 668 Scheele, B. C. et al. 2019. Amphibian fungal panzootic causes catastrophic and ongoing loss of  
669 biodiversity. - *Science* (80-. ). 363: 1459–1463.
- 670 Scott, D. E. et al. 2007. Amphibian lipid levels at metamorphosis correlate to post-metamorphic  
671 terrestrial survival. - *Oecologia* 153: 521–532.
- 672 Spitzen-van der Sluijs, A. et al. 2016. Expanding distribution of lethal amphibian fungus  
673 *Batrachochytrium salamandrivorans* in Europe. - *Emerg. Infect. Dis.* 22: 1286–1288.
- 674 Squires, Z. E. et al. 2010. Compensatory growth in tadpoles after transient salinity stress. - *Mar.*  
675 *Freshw. Res.* 61: 219–222.
- 676 Stefan, H. G. et al. 2001. Simulated fish habitat changes in North American lakes in response to  
677 projected climate warming. - *Trans. Am. Fish. Soc.* 130: 459–477.
- 678 Stillman, J. H. 2019. Heat waves, the new normal: Summertime temperature extremes will  
679 impact animals, ecosystems, and human communities. - *Physiology* 34: 86–100.
- 680 Stoks, R. et al. 2006. Physiological costs of compensatory growth in a damselfly. - *Ecology* 87:  
681 1566–74.
- 682 Stuart, S. N. et al. 2004. Status and trends of amphibian declines and extinctions worldwide. -  
683 *Science* 306: 1783–1786.
- 684 Sunday, J. M. et al. 2011. Global analysis of thermal tolerance and latitude in ectotherms. - *Proc.*  
685 *R. Soc. B Biol. Sci.* 278: 1823–1830.
- 686 Truebano, M. et al. 2018. Thermal strategies vary with life history stage. - *J. Exp. Biol.* 221:

- 687 jeb171629.
- 688 Ultsch, G. R. et al. 1999. Physiology: Coping with the environment. - In: McDiarmid, R. W. and  
689 Altig, R. (eds), Tadpoles: the biology of anuran larvae. University of Chicago Press,  
690 Chicago, USA., pp. 189–214.
- 691 USEPA 2002. Methods for Measuring the Acute Toxicity of Effluents and Receiving Waters to  
692 Freshwater and Marine Organisms. - United States Environmental Protection Agency  
693 Office of Water (4303T).
- 694 Üveges, B. et al. 2016. Experimental evidence for beneficial effects of projected climate change  
695 on hibernating amphibians. - Sci. Rep. 6: 26754.
- 696 Van Rooij, P. et al. 2015. Amphibian chytridiomycosis: A review with focus on fungus-host  
697 interactions. - Vet. Res. 46: 1–22.
- 698 Voyles, J. et al. 2009. Pathogenesis of chytridiomycosis, a cause of catastrophic amphibian  
699 declines. - Science (80-. ). 326: 582–585.
- 700 Voyles, J. et al. 2017. Diversity in growth patterns among strains of the lethal fungal pathogen  
701 *Batrachochytrium dendrobatidis* across extended thermal optima. - Oecologia 184: 363–  
702 373.
- 703 Wake, D. B. and Vredenburg, V. T. 2008. Are we in the midst of the sixth mass extinction? A  
704 view from the world of amphibians. - Proc. Natl. Acad. Sci. U. S. A. 105: 11466–73.
- 705 Wallace, H. and Wallace, B. M. N. 2000. Sex reversal of the newt *Triturus cristatus* reared at  
706 extreme temperatures. - Int. J. Dev. Biol. 44: 807–810.
- 707 Wedekind, C. 2017. Demographic and genetic consequences of disturbed sex determination. -  
708 Philos. Trans. R. Soc. B Biol. Sci. 372: 20160326.
- 709 Welbergen, J. A. et al. 2008. Climate change and the effects of temperature extremes on  
710 Australian flying-foxes. - Proc. R. Soc. B Biol. Sci. 275: 419–425.
- 711 Whiteley, S. L. et al. 2021. Temperature-induced sex reversal in reptiles: Prevalence, discovery,  
712 and evolutionary implications. - Sex. Dev. 15: 148–156.
- 713 Williams, C. M. et al. 2016. Biological impacts of thermal extremes: mechanisms and costs of  
714 functional responses matter. - Integr. Comp. Biol. 56: 73–84.
- 715 Woodhams, D. C. and Alford, R. A. 2005. Ecology of chytridiomycosis in rainforest stream frog  
716 assemblages of tropical Queensland. - Conserv. Biol. 19: 1449–1459.
- 717 Woodhams, D. C. et al. 2003. Emerging disease of amphibians cured by elevated body  
718 temperature. - Dis. Aquat. Organ. 55: 65–67.
- 719 Xu, Y. et al. 2021. Male heterogametic sex determination in *Rana dybowskii* based on sex-linked  
720 molecular markers. - Integr. Zool.: in press.
- 721

722  
 723 Table 1: Agile frog responses to heat by the timing of exposure (1<sup>st</sup>, 2<sup>nd</sup> and 3<sup>rd</sup> larval period) and  
 724 the applied temperature. Results represent pre-planned comparisons from the models shown in  
 725 Table S2, comparing each period and temperature combination to the 19°C treatment in the  
 726 corresponding period. Linear contrasts (*c*), associated standard errors (SE), t-values (z-values in  
 727 case of Cox’s proportional hazards model in the analyses of survival) and *P*-values adjusted  
 728 using the FDR method are reported. Treatment groups that differed significantly (*P* < 0.05) from  
 729 their corresponding controls are highlighted in bold.

| Dependent variable                       | Period   | Temperature (°C) | <i>c</i>      | SE           | <i>t</i> (or <i>z</i> ) | <i>P</i>          |
|------------------------------------------|----------|------------------|---------------|--------------|-------------------------|-------------------|
| Survival*                                | 1        | 28               | 0.31          | 0.51         | 0.62                    | 0.610             |
|                                          | 2        | 28               | -0.47         | 0.91         | -0.51                   | 0.610             |
|                                          | 3        | 28               | -0.43         | 0.65         | -0.67                   | 0.610             |
|                                          | <b>1</b> | <b>30</b>        | <b>2.11</b>   | <b>0.43</b>  | <b>4.85</b>             | <b>&lt; 0.001</b> |
|                                          | <b>2</b> | <b>30</b>        | <b>1.56</b>   | <b>0.65</b>  | <b>2.41</b>             | <b>0.048</b>      |
|                                          | 3        | 30               | 0.60          | 0.52         | 1.16                    | 0.490             |
| Length of larval development (log(days)) | <b>1</b> | <b>28</b>        | <b>0.14</b>   | <b>0.03</b>  | <b>4.38</b>             | <b>&lt; 0.001</b> |
|                                          | <b>2</b> | <b>28</b>        | <b>0.05</b>   | <b>0.01</b>  | <b>4.58</b>             | <b>&lt; 0.001</b> |
|                                          | <b>3</b> | <b>28</b>        | <b>0.05</b>   | <b>0.02</b>  | <b>2.57</b>             | <b>0.011</b>      |
|                                          | <b>1</b> | <b>30</b>        | <b>0.24</b>   | <b>0.04</b>  | <b>6.24</b>             | <b>&lt; 0.001</b> |
|                                          | <b>2</b> | <b>30</b>        | <b>0.19</b>   | <b>0.02</b>  | <b>8.29</b>             | <b>&lt; 0.001</b> |
|                                          | <b>3</b> | <b>30</b>        | <b>0.14</b>   | <b>0.02</b>  | <b>9.12</b>             | <b>&lt; 0.001</b> |
| Body mass at metamorphosis (mg)          | <b>1</b> | <b>28</b>        | <b>-52.53</b> | <b>19.20</b> | <b>-2.74</b>            | <b>0.020</b>      |
|                                          | 2        | 28               | 7.75          | 11.20        | 0.69                    | 0.490             |
|                                          | 3        | 28               | -23.12        | 13.50        | -1.71                   | 0.106             |
|                                          | 1        | 30               | -51.06        | 27.00        | -1.89                   | 0.089             |
|                                          | <b>2</b> | <b>30</b>        | <b>-32.23</b> | <b>13.60</b> | <b>-2.37</b>            | <b>0.036</b>      |
|                                          | <b>3</b> | <b>30</b>        | <b>-34.01</b> | <b>12.30</b> | <b>-2.77</b>            | <b>0.020</b>      |
| Net body mass at dissection (g)          | 1        | 28               | 0.03          | 0.03         | 1.01                    | 0.374             |
|                                          | 2        | 28               | 0.07          | 0.03         | 2.05                    | 0.123             |
|                                          | 3        | 28               | -0.07         | 0.03         | -1.76                   | 0.127             |
|                                          | 1        | 30               | 0.09          | 0.05         | 1.73                    | 0.127             |
|                                          | <b>2</b> | <b>30</b>        | <b>0.13</b>   | <b>0.03</b>  | <b>3.97</b>             | <b>&lt; 0.001</b> |
|                                          | 3        | 30               | -0.02         | 0.03         | -0.63                   | 0.528             |
| Size of fat bodies**                     | <b>1</b> | <b>28</b>        | <b>-1.76</b>  | <b>0.47</b>  | <b>-3.78</b>            | <b>&lt; 0.001</b> |
|                                          | 2        | 28               | 0.21          | 0.38         | 0.54                    | 0.705             |
|                                          | 3        | 28               | 0.47          | 0.41         | 1.15                    | 0.375             |
|                                          | <b>1</b> | <b>30</b>        | <b>-1.86</b>  | <b>0.56</b>  | <b>-3.31</b>            | <b>0.003</b>      |

|                                                     |          |           |             |             |             |              |
|-----------------------------------------------------|----------|-----------|-------------|-------------|-------------|--------------|
|                                                     | 2        | 30        | -0.73       | 0.42        | -1.71       | 0.175        |
|                                                     | 3        | 30        | 0.06        | 0.43        | 0.14        | 0.889        |
| Phenotypic sex<br>ratio (proportion<br>of males)*** | 1        | 28        | -0.22       | 0.47        | -0.47       | 0.640        |
|                                                     | 2        | 28        | 0.72        | 0.45        | 1.62        | 0.127        |
|                                                     | <b>3</b> | <b>28</b> | <b>3.83</b> | <b>1.06</b> | <b>3.60</b> | <b>0.002</b> |
|                                                     | <b>1</b> | <b>30</b> | <b>1.63</b> | <b>0.71</b> | <b>2.30</b> | <b>0.034</b> |
|                                                     | <b>2</b> | <b>30</b> | <b>1.54</b> | <b>0.55</b> | <b>2.80</b> | <b>0.011</b> |
|                                                     | <b>3</b> | <b>30</b> | <b>3.70</b> | <b>1.06</b> | <b>3.47</b> | <b>0.002</b> |

\*The linear contrast is the log(hazard ratio)

\*\*The linear contrast is the log(cumulative odds ratio)

\*\*\*The linear contrast is the log(odds ratio)

730

731

732 Table 2: Common toad responses to heat by the timing of exposure (1<sup>st</sup>, 2<sup>nd</sup> and 3<sup>rd</sup> larval period)  
 733 and the applied temperature. Results represent pre-planned comparisons from the models shown  
 734 in Table S2, comparing each period and temperature combination to the 19°C treatment in the  
 735 corresponding period. Linear contrasts (*c*), associated standard errors (SE), t-values (z-values in  
 736 case of Cox’s proportional hazards model in the analyses of survival) and *P*-values adjusted  
 737 using the FDR method are reported. Treatment groups that differed significantly (*P* < 0.05) from  
 738 their corresponding controls are highlighted in bold.

| Dependent variable                  | Period   | Temperature (°C) | <i>c</i>      | SE          | <i>t</i> (or <i>z</i> ) | <i>P</i>          |
|-------------------------------------|----------|------------------|---------------|-------------|-------------------------|-------------------|
| Survival*                           | 1        | 28               | -0.06         | 0.40        | -0.15                   | 0.882             |
|                                     | 2        | 28               | 0.88          | 0.60        | 1.46                    | 0.433             |
|                                     | 3        | 28               | -0.21         | 0.56        | -0.38                   | 0.882             |
|                                     | 1        | 30               | -0.09         | 0.42        | -0.23                   | 0.882             |
|                                     | <b>2</b> | <b>30</b>        | <b>1.51</b>   | <b>0.57</b> | <b>2.66</b>             | <b>0.047</b>      |
|                                     | 3        | 30               | 0.12          | 0.53        | 0.23                    | 0.882             |
| Length of larval development (days) | 1        | 28               | 0.03          | 1.55        | 0.02                    | 0.986             |
|                                     | <b>2</b> | <b>28</b>        | <b>-7.24</b>  | <b>0.59</b> | <b>-12.21</b>           | <b>&lt; 0.001</b> |
|                                     | <b>3</b> | <b>28</b>        | <b>-7.11</b>  | <b>0.81</b> | <b>-8.73</b>            | <b>&lt; 0.001</b> |
|                                     | 1        | 30               | -0.48         | 0.96        | -0.50                   | 0.742             |
|                                     | 2        | 30               | -1.28         | 0.95        | -1.36                   | 0.263             |
|                                     | <b>3</b> | <b>30</b>        | <b>-3.24</b>  | <b>0.87</b> | <b>-3.76</b>            | <b>&lt; 0.001</b> |
| Body mass at metamorphosis (mg)     | <b>1</b> | <b>28</b>        | <b>-63.80</b> | <b>8.04</b> | <b>-7.93</b>            | <b>&lt; 0.001</b> |
|                                     | <b>2</b> | <b>28</b>        | <b>-63.20</b> | <b>7.89</b> | <b>-8.01</b>            | <b>&lt; 0.001</b> |
|                                     | <b>3</b> | <b>28</b>        | <b>-73.00</b> | <b>7.36</b> | <b>-9.92</b>            | <b>&lt; 0.001</b> |
|                                     | <b>1</b> | <b>30</b>        | <b>-54.00</b> | <b>7.29</b> | <b>-7.40</b>            | <b>&lt; 0.001</b> |
|                                     | <b>2</b> | <b>30</b>        | <b>-76.30</b> | <b>9.30</b> | <b>-8.02</b>            | <b>&lt; 0.001</b> |
|                                     | <b>3</b> | <b>30</b>        | <b>-73.50</b> | <b>9.32</b> | <b>-7.88</b>            | <b>&lt; 0.001</b> |
| Net body mass at dissection (g)     | 1        | 28               | -0.39         | 0.17        | -2.27                   | 0.144             |
|                                     | 2        | 28               | -0.01         | 0.15        | -0.06                   | 0.950             |
|                                     | 3        | 28               | -0.02         | 0.12        | -0.14                   | 0.950             |
|                                     | 1        | 30               | -0.28         | 0.15        | -1.95                   | 0.156             |
|                                     | 2        | 30               | -0.29         | 0.20        | -1.47                   | 0.288             |
|                                     | 3        | 30               | 0.11          | 0.13        | 0.83                    | 0.615             |
| Size of fat bodies**                | 1        | 28               | -0.11         | 0.47        | -0.23                   | 0.941             |
|                                     | 2        | 28               | 0.03          | 0.47        | 0.07                    | 0.941             |
|                                     | 3        | 28               | -0.57         | 0.47        | -1.21                   | 0.675             |

|                      |   |    |       |      |       |       |
|----------------------|---|----|-------|------|-------|-------|
|                      | 1 | 30 | -0.09 | 0.47 | -0.20 | 0.941 |
|                      | 2 | 30 | -0.19 | 0.48 | -0.39 | 0.941 |
|                      | 3 | 30 | -0.97 | 0.46 | -2.11 | 0.211 |
| Phenotypic sex ratio | 1 | 28 | -0.67 | 0.48 | -1.38 | 0.377 |
| (proportion of       | 2 | 28 | -0.46 | 0.45 | -1.01 | 0.377 |
| males)***            | 3 | 28 | 0.76  | 0.46 | 1.65  | 0.377 |
|                      | 1 | 30 | -0.58 | 0.49 | -1.19 | 0.377 |
|                      | 2 | 30 | -0.23 | 0.48 | -0.50 | 0.621 |
|                      | 3 | 30 | 0.55  | 0.49 | 1.13  | 0.377 |

\*The linear contrast is the log(hazard ratio)

\*\*The linear contrast is the log(cumulative odds ratio)

\*\*\*The linear contrast is the log(odds ratio)

739

740



741

742 Figure Legends

743 Figure 1: A schematic illustration of experimental treatments. Each horizontal bar represents one  
744 treatment group. Striped bars represent periods when tadpoles were exposed to thermal  
745 treatments. Orange (28 °C) and red (30 °C) bars symbolize heat treatments, while blue filling  
746 represents maintenance at 19 °C. Treatments were identical in both species.

747

748 Figure 2: Survival of agile frogs (a) and common toads (b) during the experiment over time in  
749 each treatment group. Blue lines represent controls maintained at 19 °C throughout, orange lines  
750 represent treatment groups exposed to 28 °C, red lines represent treatment groups exposed to 30  
751 °C; dotted lines represent individuals exposed to thermal treatments during the 1<sup>st</sup> larval period,  
752 dashed lines those exposed during the 2<sup>nd</sup> larval period, and solid lines those exposed during the  
753 3<sup>rd</sup> larval period. Numbered vertical lanes depict the respective larval periods when thermal  
754 treatments were performed. Note that the experiment lasted longer for common toads than for  
755 agile frogs.

756

757 Figure 3: Agile frog responses to thermal treatments in terms of the length of larval development,  
758 body mass at metamorphosis, net body mass at dissection, the size of fat bodies and phenotypic  
759 sex ratios in juveniles. In boxplots, horizontal lines and boxes represent medians and  
760 interquartile ranges (IQR), respectively, while whiskers extend to  $IQR \pm 1.5 \times IQR$  and dots  
761 indicate more extreme data points.

762

763 Figure 4: Common toad responses to thermal treatments in terms of the length of larval  
764 development, body mass at metamorphosis, net body mass at dissection, the size of fat bodies

765 and phenotypic sex ratios in juveniles. In boxplots, horizontal lines and boxes represent medians  
766 and interquartile ranges (IQR), respectively, while whiskers extend to  $IQR \pm 1.5 \times IQR$  and dots  
767 indicate more extreme data points.

768

769 Figure 5: Summary of responses by the two species to the simulated heat waves in different  
770 larval periods. Arrows show the direction of the observed change in the given variable relative to  
771 the respective control group, not the advantageousness or harmfulness of the effect. Separation is  
772 aided by different colours.

773

774 Ujszegi et al., Fig. 1

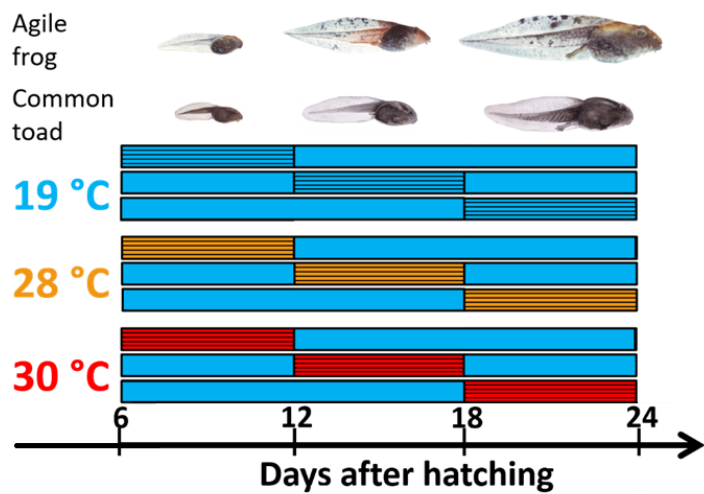

775

776

777

778 Ujszegi et al., Fig. 2

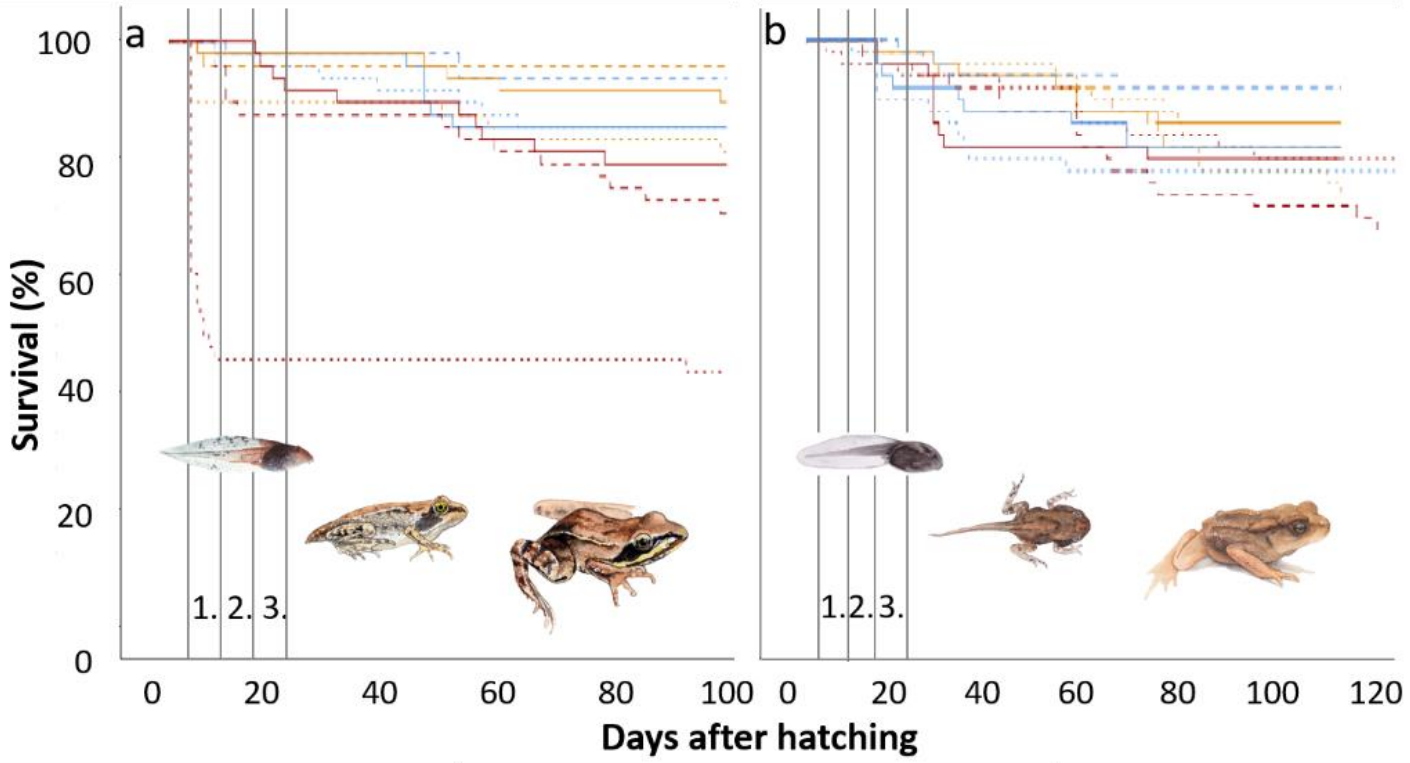

779

780

781

782 Ujszegi et al., Fig. 3

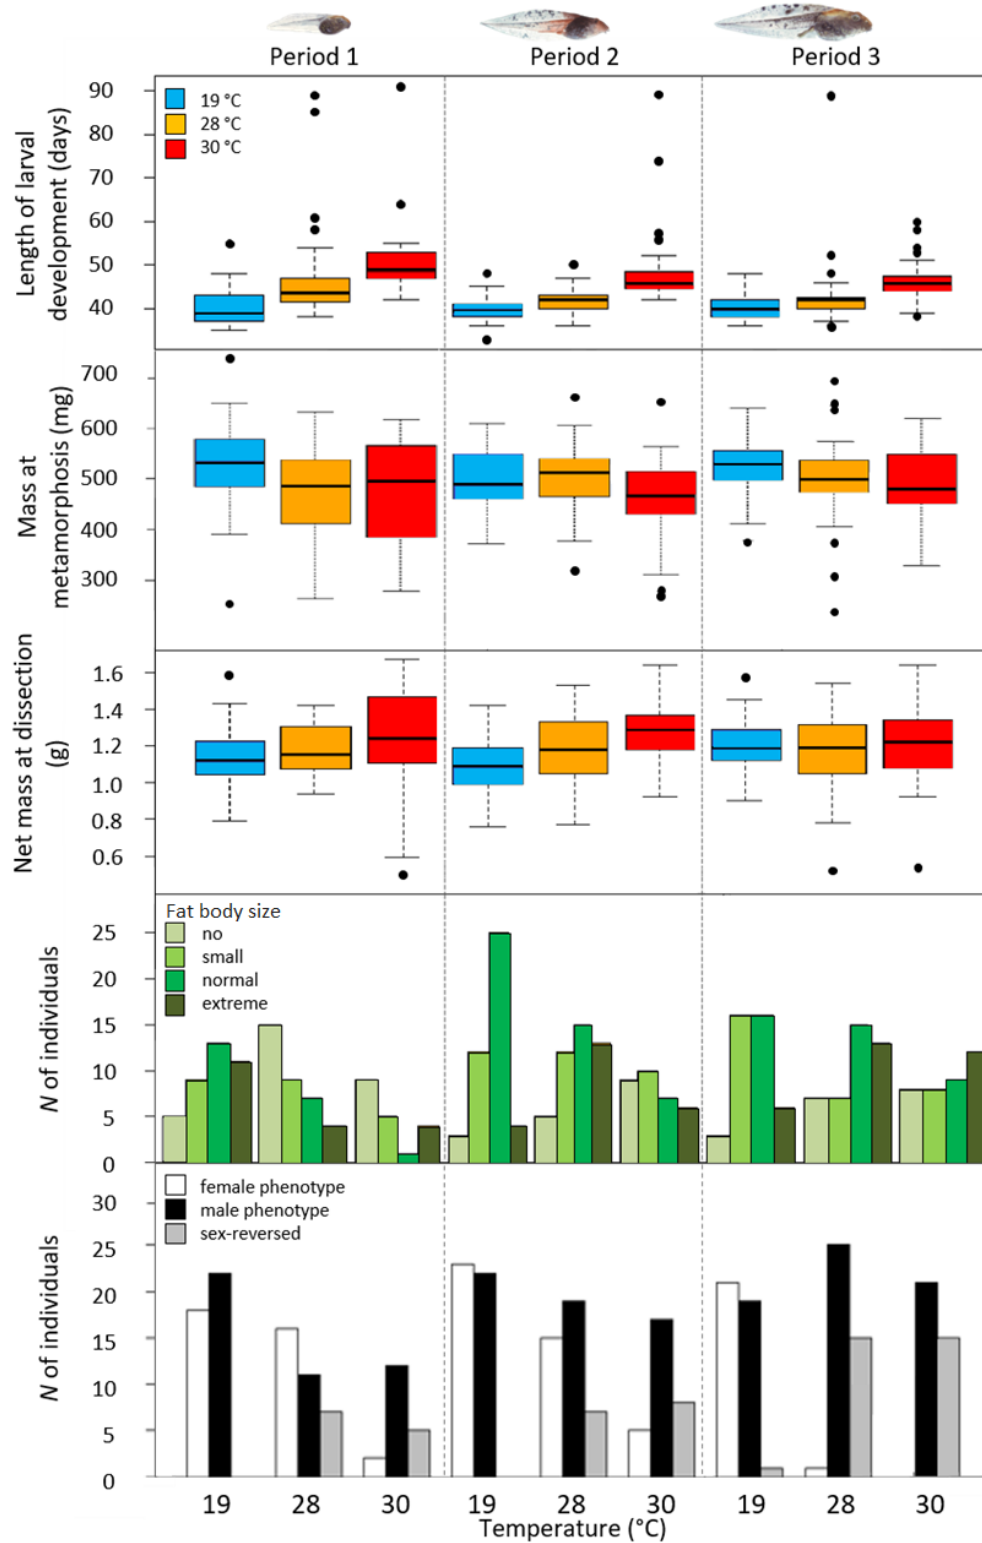

783

784

785 Ujszegi et al., Fig. 4

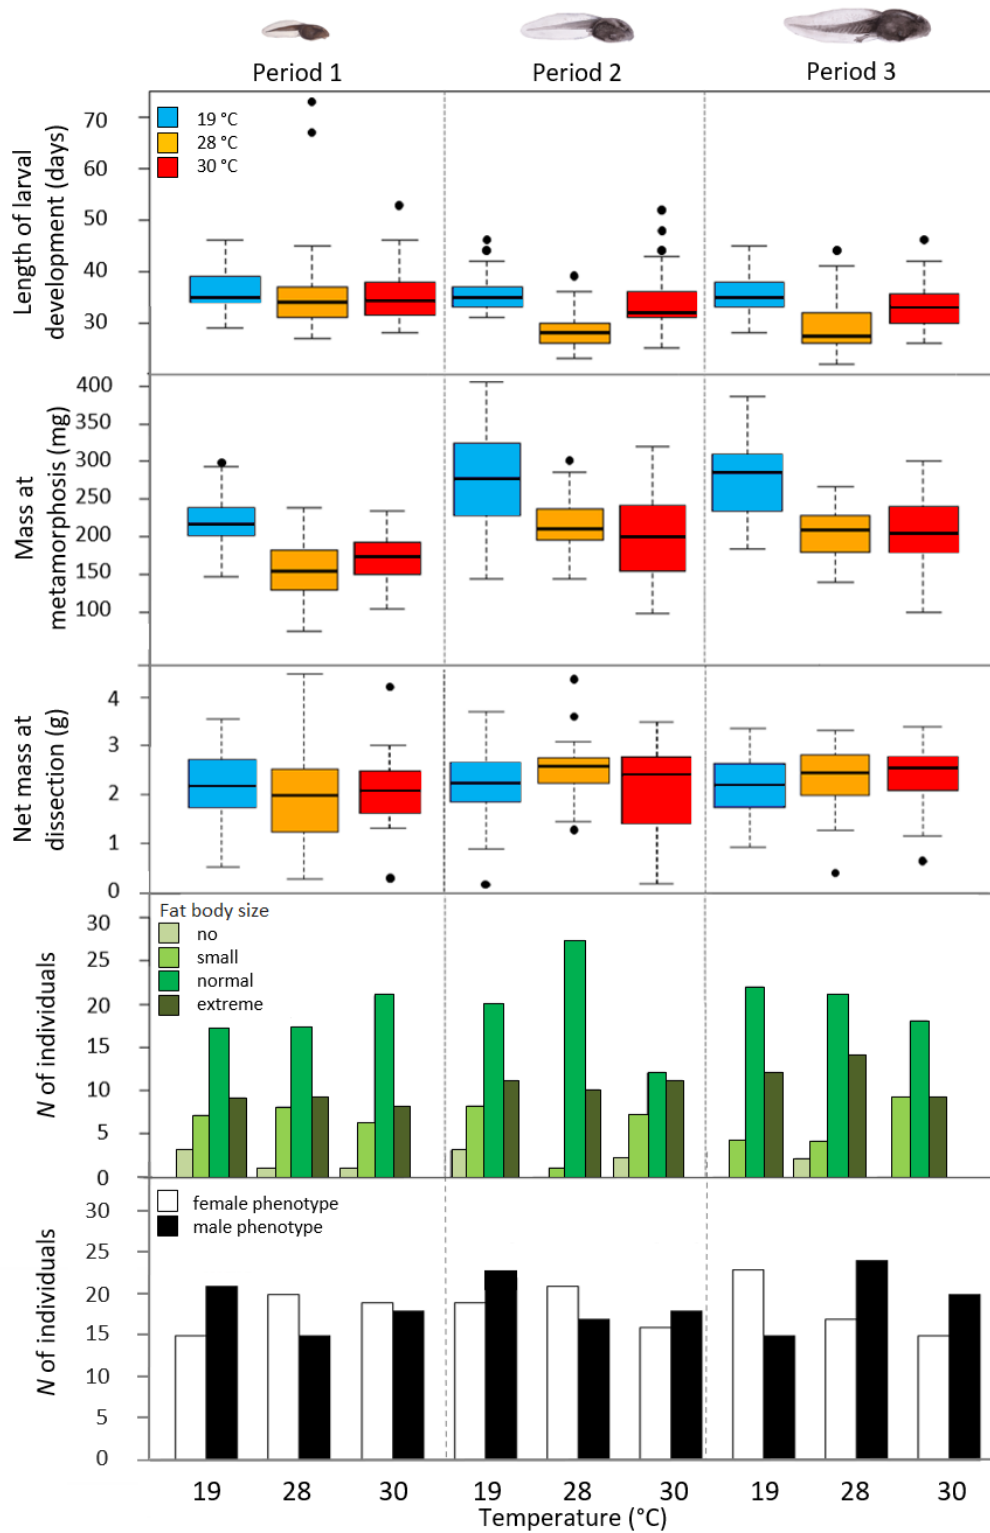

786

787

788 Ujszegi et al., Fig. 5

| Treatment combinations per species<br>Variables | <br>Agile frog ( <i>Rana dalmatina</i> ) |       |          |       |          |       | <br>Common toad ( <i>Bufo bufo</i> ) |       |          |       |          |       |
|-------------------------------------------------|---------------------------------------------------------------------------------------------------------------------------|-------|----------|-------|----------|-------|-------------------------------------------------------------------------------------------------------------------------|-------|----------|-------|----------|-------|
|                                                 | Period 1                                                                                                                  |       | Period 2 |       | Period 3 |       | Period 1                                                                                                                |       | Period 2 |       | Period 3 |       |
|                                                 | 28 °C                                                                                                                     | 30 °C | 28 °C    | 30 °C | 28 °C    | 30 °C | 28 °C                                                                                                                   | 30 °C | 28 °C    | 30 °C | 28 °C    | 30 °C |
|                                                 | Survival                                                                                                                  |       | ↓        |       | ↓        |       |                                                                                                                         |       |          |       | ↓        |       |
| Length of larval development                    | ↑                                                                                                                         | ↑     | ↑        | ↑     | ↑        | ↑     |                                                                                                                         |       | ↓        |       | ↓        | ↓     |
| Body mass at metamorphosis                      | ↓                                                                                                                         |       |          | ↓     |          | ↓     | ↓                                                                                                                       | ↓     | ↓        | ↓     | ↓        | ↓     |
| Net body mass at dissection                     |                                                                                                                           |       |          | ↑     |          |       |                                                                                                                         |       |          |       |          |       |
| Fat body size                                   | ↓                                                                                                                         | ↓     |          |       |          |       |                                                                                                                         |       |          |       |          |       |
| Ratio of phenotypic males                       |                                                                                                                           | ↑     |          | ↑     | ↑        | ↑     |                                                                                                                         |       |          |       |          |       |

789

Supporting Information to:

“Heat waves” experienced during larval life have species-specific consequences on life-history traits and sexual development in anuran amphibians

János Ujszegi<sup>1,2\*</sup>, Réka Bertalan<sup>1</sup>, Nikolett Ujhegyi<sup>1</sup>, Viktória Verebélyi<sup>1</sup>, Edina Nemesházi<sup>1,3,4</sup>, Zsanett Mikó<sup>1</sup>, Andrea Kásler<sup>1,5</sup>, Dávid Herczeg<sup>1</sup>, Márk Szederkényi<sup>1</sup>, Nóra Vili<sup>4</sup>, Zoltán Gál<sup>6</sup>, Orsolya I. Hoffmann<sup>6</sup>, Veronika Bókony<sup>1,4§</sup>, Attila Hettyey<sup>1,2,4§</sup>

<sup>1</sup>Lendület Evolutionary Ecology Research Group, Plant Protection Institute, Centre for Agricultural Research, Eötvös Loránd Research Network, Budapest, Hungary

<sup>2</sup>Department of Systematic Zoology and Ecology, Eötvös Loránd University, Budapest, Hungary

<sup>3</sup>Konrad Lorenz Institute of Ethology Department of Interdisciplinary Life Sciences University of Veterinary Medicine, Vienna, Austria

<sup>4</sup>Conservation Genetics Research Group, Department of Ecology, Institute for Biology, University of Veterinary Medicine, Budapest, Hungary

<sup>5</sup>Doctoral School of Biology, Institute of Biology, Eötvös Loránd University, Budapest, Hungary

<sup>6</sup>Animal Biotechnology Department, Institute of Genetics and Biotechnology, Hungarian University of Agriculture and Life Science, Gödöllő, Hungary

\*Corresponding author

e-mail: [ujszegi.janos@gmail.com](mailto:ujszegi.janos@gmail.com)

tel.: +36-1-3918607

fax: +36-1-3918653

ORCID ID: 0000-0002-6030-0772

<sup>§</sup>Veronika Bókony and Attila Hettyey should be considered joint senior author



### 30 **Measurements validating temperature in heat treatments**

31 We validated the heating setup by repeatedly measuring water temperature ( $\pm 0.1$  °C) in tadpole  
32 containers of each position in each tray, as well as water temperature in the trays in which  
33 treatments took place. Before the experiment, we measured these temperatures ten times on two  
34 consecutive days with a Greisinger digital thermometer (GTH175/PT). After termination of the  
35 experiment, we repeated these measurements five times. To detect eventual temperature  
36 fluctuations during each treatment, twice per day we checked water temperature in all trays  
37 using the digital thermometer. Furthermore, data loggers (Onset HOBO Pendant  
38 Temperature/Light 8K Data Logger; one per each tray) recorded temperature in the trays every  
39 30 minutes during the treatments. We did not measure temperature in the tadpole containers  
40 during the treatment periods in order to avoid stress and injury as a result of stirring the water.

41 We did not detect considerable temperature fluctuations during the treatments (Fig S1,  
42 Table S1), and temperature readings were very similar before and after the experiment in each  
43 container position. Temperature did vary somewhat among containers in different positions  
44 within trays (maximal temperature difference within a tray at 19 °C: 1.3 °C; at 28 °C: 1.5 °C;  
45 at 30 °C: 1.5 °C), but this variation was highly consistent over time. We calculated the  
46 difference between the actual (experienced by the tadpoles) and nominal temperature of the  
47 given treatment for each tadpole container by subtracting the nominal temperature from the  
48 mean water temperature (measured before and after the treatments in each container with the  
49 digital thermometer). This method minimised the disturbance caused to animals during the  
50 experiment while delivering accurate data on the temperatures experienced by the tadpoles.

51

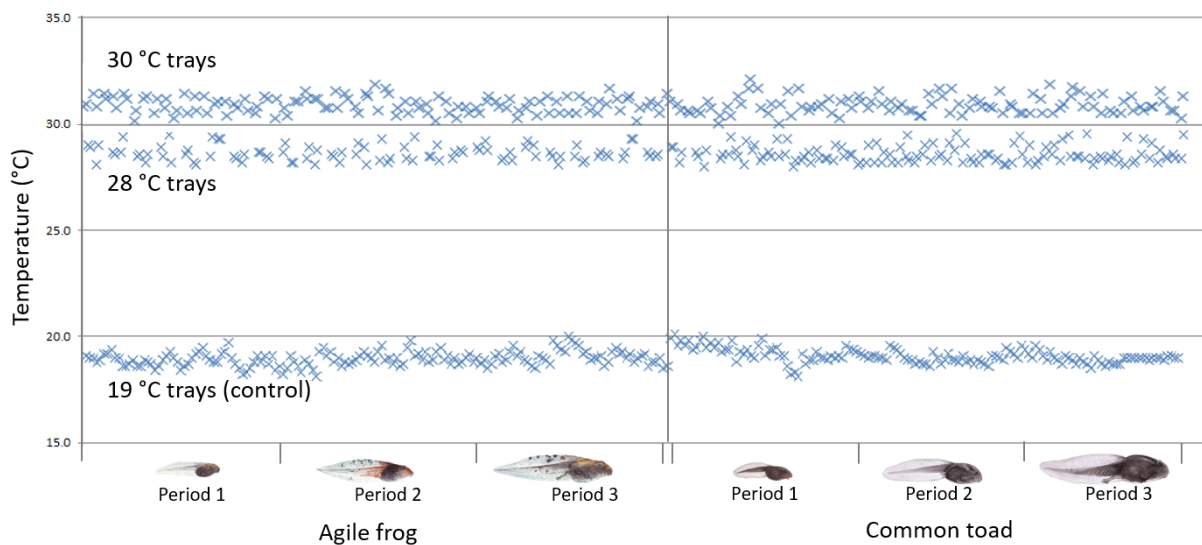

52

53

54 **Figure S1** Water temperatures in the trays during treatment periods show minimal temperature  
55 fluctuations. Note that the water temperature in the heated trays was always warmer than the  
56 temperature in the tadpoles' containers (set to be as close to the nominal temperature as  
57 possible; Table S1).

58

59 **Table S1** Minimal ( $T_{\min}$ ), maximal ( $T_{\max}$ ) and mean ( $T_{\text{mean}}$ ) temperatures in the heated trays  
60 during temperature treatments. Mean diff. represents the average difference in water  
61 temperature between the tadpoles' containers and the trays, since water temperature in the  
62 heated trays was always warmer than the temperature in the tadpoles' containers.

| Tray    | $T_{\min}$ (°C) | $T_{\max}$ (°C) | $T_{\text{mean}}$ (°C) | Mean diff. ( $\pm$ SE) |
|---------|-----------------|-----------------|------------------------|------------------------|
| 30°C /1 | 30.6            | 31.6            | 31.0                   | 1.1 ( $\pm$ 0.13)      |
| 30°C /2 | 30.2            | 31.6            | 30.8                   | 1.1 ( $\pm$ 0.10)      |
| 30°C /3 | 30.4            | 31.6            | 30.9                   | 0.5 ( $\pm$ 0.09)      |
| 30°C /4 | 30.5            | 31.3            | 30.8                   | 0.7 ( $\pm$ 0.09)      |
| 28°C /1 | 28.2            | 28.9            | 28.5                   | 0.4 ( $\pm$ 0.06)      |
| 28°C /2 | 28.4            | 29.4            | 28.8                   | 0.1 ( $\pm$ 0.07)      |
| 28°C /3 | 28.0            | 29.5            | 28.5                   | 0.5 ( $\pm$ 0.06)      |
| 28°C /4 | 28.1            | 29.5            | 28.6                   | 1.1 ( $\pm$ 0.08)      |

63  
64

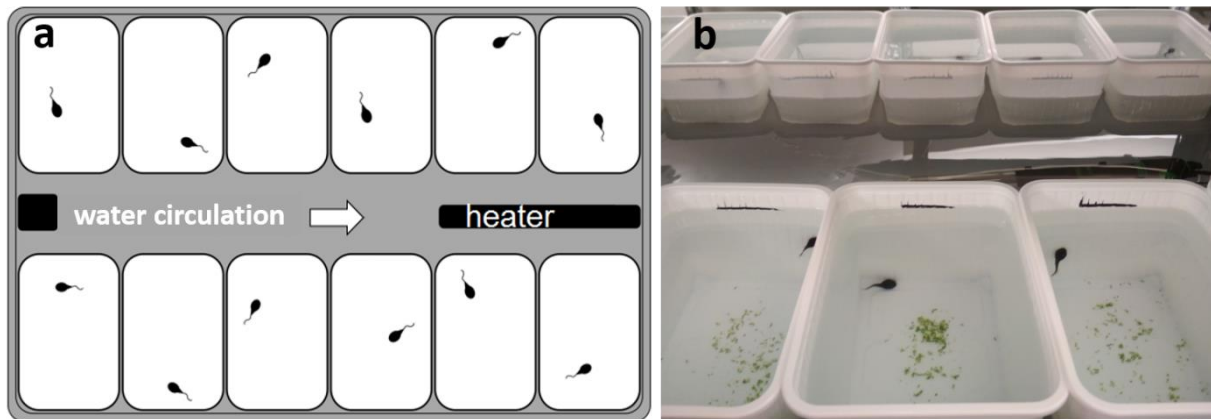

65

66 **Figure S2** Schematic representation (a) and *in situ* photograph (b) of the heating system used  
67 in the thermal treatments.

68

69 **Table S2** Phenotypic sex ratio (% males) in each treatment group. In case of agile frogs, genetic  
 70 sex ratio and female-to-male sex-reversal rate (% of phenotypic males in genetic females) are  
 71 also shown.

| Species     | Treatment group | Dissected (N) | Phenotypic sex ratio (% male) <sup>†</sup> | Genetic sex ratio (% male) <sup>‡</sup> | Female-to-male sex reversal (%) |
|-------------|-----------------|---------------|--------------------------------------------|-----------------------------------------|---------------------------------|
| Agile frog  | Period 1        |               |                                            |                                         |                                 |
|             | Control         | 40            | 55.0                                       | 55.0                                    | 0.0                             |
|             | 28 °C           | 39            | 52.9                                       | 32.4                                    | 30.4                            |
|             | 30 °C           | 19            | 89.5*                                      | 63.2                                    | 71.4                            |
|             | Period 2        |               |                                            |                                         |                                 |
|             | Control         | 45            | 48.9                                       | 48.9                                    | 0.0                             |
|             | 28 °C           | 46            | 63.4                                       | 46.3                                    | 31.8                            |
|             | 30 °C           | 32            | 83.3*                                      | 56.6                                    | 61.5                            |
|             | Period 3        |               |                                            |                                         |                                 |
|             | Control         | 41            | 48.8                                       | 46.3                                    | 4.5                             |
|             | 28 °C           | 43            | 97.5*                                      | 60.9                                    | 93.8                            |
|             | 30 °C           | 37            | 100.0*                                     | 58.3                                    | 100.0                           |
| Common toad | Period 1        |               |                                            |                                         |                                 |
|             | Control         | 36            | 58.3                                       |                                         |                                 |
|             | 28 °C           | 35            | 42.9                                       |                                         |                                 |
|             | 30 °C           | 37            | 48.6                                       |                                         |                                 |
|             | Period 2        |               |                                            |                                         |                                 |
|             | Control         | 42            | 54.8                                       |                                         |                                 |
|             | 28 °C           | 39            | 43.6                                       |                                         |                                 |
|             | 30 °C           | 34            | 52.9                                       |                                         |                                 |
|             | Period 3        |               |                                            |                                         |                                 |
|             | Control         | 38            | 39.5                                       |                                         |                                 |
|             | 28 °C           | 41            | 58.5                                       |                                         |                                 |
|             | 30 °C           | 36            | 55.6                                       |                                         |                                 |

\*Sex ratios that differ significantly from 1:1 according to Fisher's exact tests

†Excluding those individuals whose gonads were not unambiguously categorizable either as male or female (3 agile frogs: 2 individuals at 28 °C in the 2<sup>nd</sup> larval period and 1 individual at 30 °C in the 2<sup>nd</sup> larval period; 2 common toads: 1 individual at 28 °C in the 2<sup>nd</sup> larval period and 1 individual at 30 °C in the 3<sup>rd</sup> larval period)

‡Excluding those individuals whose genetic sex was unknown due to contradiction between the Rds1 and Rds3 markers' results (at 28 °C 1 individual in the 1<sup>st</sup>, and 2 individuals in the 3<sup>rd</sup> larval period; at 30 °C 1 individual each in the 2<sup>nd</sup> and 3<sup>rd</sup> larval periods)

73 **Table S3** Type-2 analysis-of-deviance tables of the statistical models. Significant effects ( $P <$   
 74 0.05) are highlighted in bold. The covariate "T.diff" is the difference between mean  
 75 temperatures in each tadpole container and the nominal temperature of the given treatment.

| Dependent variable           | Predictors        | Agile frog |    |                   | Common toad |    |                   |
|------------------------------|-------------------|------------|----|-------------------|-------------|----|-------------------|
|                              |                   | $\chi^2$   | df | $P$               | $\chi^2$    | df | $P$               |
| Survival                     |                   |            |    |                   |             |    |                   |
|                              | Heat              | 40.90      | 2  | <b>&lt; 0.001</b> | 2.15        | 2  | 0.340             |
|                              | Period            | 28.71      | 2  | <b>&lt; 0.001</b> | 4.71        | 2  | 0.095             |
|                              | T.diff            | 0.36       | 1  | 0.551             | 0.08        | 1  | 0.783             |
|                              | Heat×Period       | 5.48       | 4  | 0.241             | 5.93        | 4  | 0.204             |
| Length of larval development |                   |            |    |                   |             |    |                   |
|                              | Heat              | 195.34     | 2  | <b>&lt; 0.001</b> | 208.73      | 2  | <b>&lt; 0.001</b> |
|                              | Period            | 9.04       | 2  | <b>0.011</b>      | 7.19        | 2  | <b>0.028</b>      |
|                              | T.diff            | 0.05       | 1  | 0.817             | 0.36        | 1  | 0.548             |
|                              | Heat×Period       | 12.03      | 4  | <b>0.017</b>      | 23.78       | 4  | <b>&lt; 0.001</b> |
| Body mass at metamorphosis   |                   |            |    |                   |             |    |                   |
|                              | Heat              | 17.44      | 2  | <b>&lt; 0.001</b> | 250.50      | 2  | <b>&lt; 0.001</b> |
|                              | Period            | 6.88       | 2  | <b>&lt; 0.001</b> | 145.80      | 2  | <b>&lt; 0.001</b> |
|                              | T.diff            | 0.02       | 1  | 0.988             | 2.66        | 1  | 0.103             |
|                              | Heat×Period       | 8.67       | 4  | 0.070             | 7.18        | 4  | 0.127             |
| Net body mass at dissection  |                   |            |    |                   |             |    |                   |
|                              | Heat              | 7.84       | 2  | <b>0.020</b>      | 1.83        | 2  | 0.399             |
|                              | Period            | 1.43       | 2  | 0.488             | 4.08        | 2  | <b>0.130</b>      |
|                              | T.diff            | 0.23       | 1  | 0.631             | 0.75        | 1  | 0.386             |
|                              | Age at dissection | 80.86      | 1  | <b>&lt; 0.001</b> | 11.38       | 1  | <b>&lt; 0.001</b> |
|                              | Heat×Period       | 14.71      | 4  | <b>&lt; 0.001</b> | 8.29        | 4  | 0.081             |
| Size of fat bodies           |                   |            |    |                   |             |    |                   |
|                              | Heat              | 7.20       | 2  | <b>0.027</b>      | 2.18        | 2  | 0.337             |
|                              | Period            | 7.03       | 2  | <b>0.030</b>      | 1.13        | 2  | 0.567             |
|                              | T.diff            | 0.07       | 1  | 0.790             | 2.46        | 1  | 0.117             |
|                              | Age at dissection | 2.56       | 1  | 0.109             | 6.87        | 1  | <b>0.009</b>      |
|                              | Heat×Period       | 17.87      | 4  | <b>0.001</b>      | 2.60        | 4  | 0.627             |
| Phenotypic sex ratio         |                   |            |    |                   |             |    |                   |
|                              | Heat              | 22.53      | 2  | <b>&lt; 0.001</b> | 0.18        | 2  | 0.916             |
|                              | Period            | 2.17       | 2  | 0.338             | 0.10        | 2  | 0.953             |
|                              | T.diff            | 0.02       | 1  | 0.964             | 3.32        | 1  | 0.068             |
|                              | Heat×Period       | 15.18      | 4  | <b>0.004</b>      | 5.92        | 4  | 0.205             |

76

77
